# Supplementary material for: Crystallographic fragment screening-based study of a novel FAD-dependent oxidoreductase from Chaetomium thermophilum
Source: PubMed Central journal article supplement (PMC8171062; doi:10.1107/s2059798321003533), 2021-05-14
Supplement: d-77-00755-sup1.pdf [file d-77-00755-sup1.pdf]

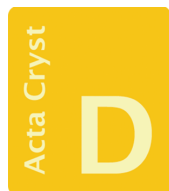

STRUCTURAL  
BIOLOGY

**Volume 77 (2021)**

**Supporting information for article:**

**Crystallographic fragment screening-based study of novel FAD-dependent oxidoreductase from *Chaetomium thermophilum***

**Leona Švecová, Lars Henrik Øestergaard, Tereza Skálová, Kirk Matthew Schnorr, Tomáš Koval', Petr Kolenko, Jan Stránský, David Sedlák, Jarmila Dušková, Mária Trundová, Jindřich Hašek and Jan Dohnálek**

## Supporting information 1

### Crystallographic fragment screening-based study of novel FAD-dependent oxidoreductase from *Chaetomium thermophilum*

Authors

**Leona Švecová<sup>ab\*</sup>, Lars H. Østergaard<sup>c</sup>, Tereza Skálová<sup>a</sup>, Kirk Schnorr<sup>c</sup>, Tomáš Koval<sup>a</sup>, Petr Kolenko<sup>ab</sup>, Jan Stránský<sup>a</sup>, David Sedlák<sup>d</sup>, Jarmila Dušková<sup>a</sup>, Mária Trundová<sup>a</sup>, Jindřich Hašek<sup>a</sup> and Jan Dohnálek<sup>a\*</sup>**

<sup>a</sup>Institute of Biotechnology of the Czech Academy of Sciences v.v.i., Průmyslová 595, Vestec, 25250, Czech Republic

<sup>b</sup>Faculty of Nuclear Sciences and Physical Engineering, Czech Technical University in Prague, Břehová 7, Prague 1, 11519, Czech Republic

<sup>c</sup>Novozymes A/S, Biologiens Vej 2, Kgs. Lyngby, 2800, Denmark

<sup>d</sup>CZ-OPENSOURCE: National Infrastructure for Chemical Biology, Institute of Molecular Genetics of the Czech Academy of Sciences v.v.i., Vídeňská 1083, Prague, 14220, Czech Republic

Correspondence email: leona.svecova@ibt.cas.cz; jan.dohnalek@ibt.cas.cz

|                                                                           |      |
|---------------------------------------------------------------------------|------|
| ATGAGGACATCAAGTTTCCAGCTTCTGGGAGCGGTTTTGCCCTCCTGTCTCTGTGCGGCAGCGAGTCCAA    | 70   |
| TGCATATCGACTCTGCAAAAGTCCCAAGACATGCCACAATTGTTACCCAAGGAACGTTCACTCCAATTA     | 140  |
| TACATTCATCATTGCTGGCGGGCGGCATATCCGGGCTCACCCCTCGCCGACCGTCTAACC GAAGATCCTCGA | 210  |
| GGTACAAACGACTCCCCTAGAGAACTATGTATGTAGGAGACTGGCTGGTTACTAATGTGCAATTTTCTCT    | 280  |
| TTTTTGCTATAGTAACCGTCTTTGTGATTGAGGCCGGTCTTTGGATCGGGGTGAAGATGGCATCCTCGT     | 350  |
| CCCGGGAGCCTTCTCTCCTTGGCTCTACTTCTGGCCCGGTCTTGTAGCACACCTCAAGCAGGGCTTAAT     | 420  |
| AACAGGACCGTTGATGTTATCACAGCGCAGGTTGTCGGTGGCGGAAGCACTATCAACGCTATGGTGTACT    | 490  |
| TGAGGTACGCTGAGCAGGCGACAGAATACGCCTTCTGCCATCAGCCAAGCTGCATGCTGACGGCGTCTA     | 560  |
| TTCAGGGGTGACAAGGATGATTATGATTCATGGGGTGCCCTCGGAAATCCGGGCTGGAGCTGGAATTCCA    | 630  |
| TGCTTCCCTATTTTCATCAAGGTAAAGCTATGGCTAGAAAGCTCCAGACAGCACCACCTGGCCCCGTGCTA   | 700  |
| ACACAGCGCAGAGTGAAGTTCACGCCCCCTAGCCCTGAACTTGTGCGGCTGGCAACATCACTTGGGA       | 770  |
| TGGTTCAATTCGGGGCCGTTCTGGTCCCGTGAACACTCATATCCCAACTATTTCTCCCGGGGAGCGGT      | 840  |
| GAGTGACAGTCTGCGGAGAGATTGTTGGCATATGAACTGAATGCTGACAATGTATCCTAAAGAAAAGTGG    | 910  |
| TGGAACGCCGCAATGAAGTCGGCCTTCTCCTGTTAAGGACCCAATGGCGGGGTCGAAGCAAGGTGTTT      | 980  |
| TCTGGATCCCCTGTCATTGATGCCAGGACTATGACAAGAAGCCATGCTCGGCGCAATCATTACGACCG      | 1050 |
| CGTCAGCTCCCGGCCAAACTACCACATCCTGCCATCTCACCTGGTGTCTAAGATTTTATTACGGGGCAAG    | 1120 |
| CAAGCCATTGGCGTGAGCTACATCCCGACTTCTGGCGGCAATACTACGACCAATGCTACGCAAGCAAGG     | 1190 |
| AGATCACCTGGCTGCTGGTGGCCTGGGAACCCGAAGATCCTGCAACTCTCGGGTATTGGCCCCCGGAA      | 1260 |
| GCTTCTCAACGAGCTCGGCTCCCTGTCAATTCGACCTCCCGGGCTCGGGCAGAACCTGCAGGACCAG       | 1330 |
| CCCACGCTGACAATCCCGTATACTTGTGCGTTTTTCTTTTTCATTGCTCCTTTTCGAGTATGTTCTGAGTC   | 1400 |
| AAGAGCGGTTGACTAACAATTTGCTTCTTCCCATGTGAAGTCACAAACAACGTGTTTCCCAACTGATA      | 1470 |
| GCCTCACCACGAACGCTACTTACAACGCCGAGCAGCGGGCATTGTATGACAGCTCGAAGCAGGGTGCTTA    | 1540 |
| CACCATCGTTAACTCCTTGAGCACGAACATTGGTGTGATGTCCCTGCAGCGGGCGGCACCCAAAAGCTAC    | 1610 |
| CGGCAGATCCAACGCCGAGCAGCGGGCATTGTATGACAGCTCGAAGCAGGGTGCTTACACCATCGTTAAC    | 1680 |
| TCCTTGAGCACGAACATTGGTGTGATGTCCCTGCAGCGGGCGGCACCCAAAAGCTACCGGCAGATCATCG    | 1750 |
| CCGCTGCCAGGGCGCGCAGTGCCTCGCTTTCTCTGCCTCCTGGCACCGACCCAGCCGTCATCCGTGGCTA    | 1820 |
| CCAGGCACAGCGCAATGCCATCCTGAAGCAGTTTGAGAACCCCAACGTCGGTGTGGCACAGTGCCTGG      | 1890 |
| GGCACGGGTAGCTCGGCGTTGGTGTACCATCTGAAGCCCTGAGCCGCGGGCACGGTCAACATTCGCTCAA    | 1960 |
| CCAATCCTCTGGACGCCCAAGAAATCGACTACCGGACGGGCACCGATCCCATCGACGCGCAGGTTACAC     | 2030 |
| GTCTTTGTTCCGCAAGAACCAGCAAATTTTCAACGCGCCGTCGATGCGCGTGCTGGGTCCAGTGAGGCA     | 2100 |
| GCACCCTTCGGCGCCAACCTGACCACCGATGAGGAGATTTATGCTGTGATGCGCGAGCTGATCAACCCGT    | 2170 |
| CGAACGCGCACCAAGTGTGTCACGGCTGCCATGATGCCAAGGATATGGGTGGTGTGTATCAAGTGAACA     | 2240 |
| GAAGGTGTATGGTGTTCAGGGCCTCCGTGTCGCGGATATCAGCTTCTGGCCCTTCCAGCTCTCAGGGTCA    | 2310 |
| CCCATGGCCACAGCGTACGCGGGCGCTGAGAGGGTACGTTCAAAGTCTCGAGTCTTCTGACAAACGTGCT    | 2380 |
| AACACGCATTTGTAGCTCGCCGATGTCATCAAGAAGGAGCACCGCCTGGCTGGCGCACCTAAGAGTCTAG    | 2450 |
| TAGGGCGCTGCATGCAATGAGAATCGCACGTCAAAACGAAAAATAATACATATAATAACTAATTTAAACA    | 2520 |
| TCAGCCATCGAGGAATAACCTCAAATCGGCCAAACAATCGGAGTAA                            | 2566 |

**Figure S1** DNA sequence encoding the *Ct*FDO. The exons are highlighted in rose colour and these are spliced together into mRNA. For a recombinant production, the complete sequence.

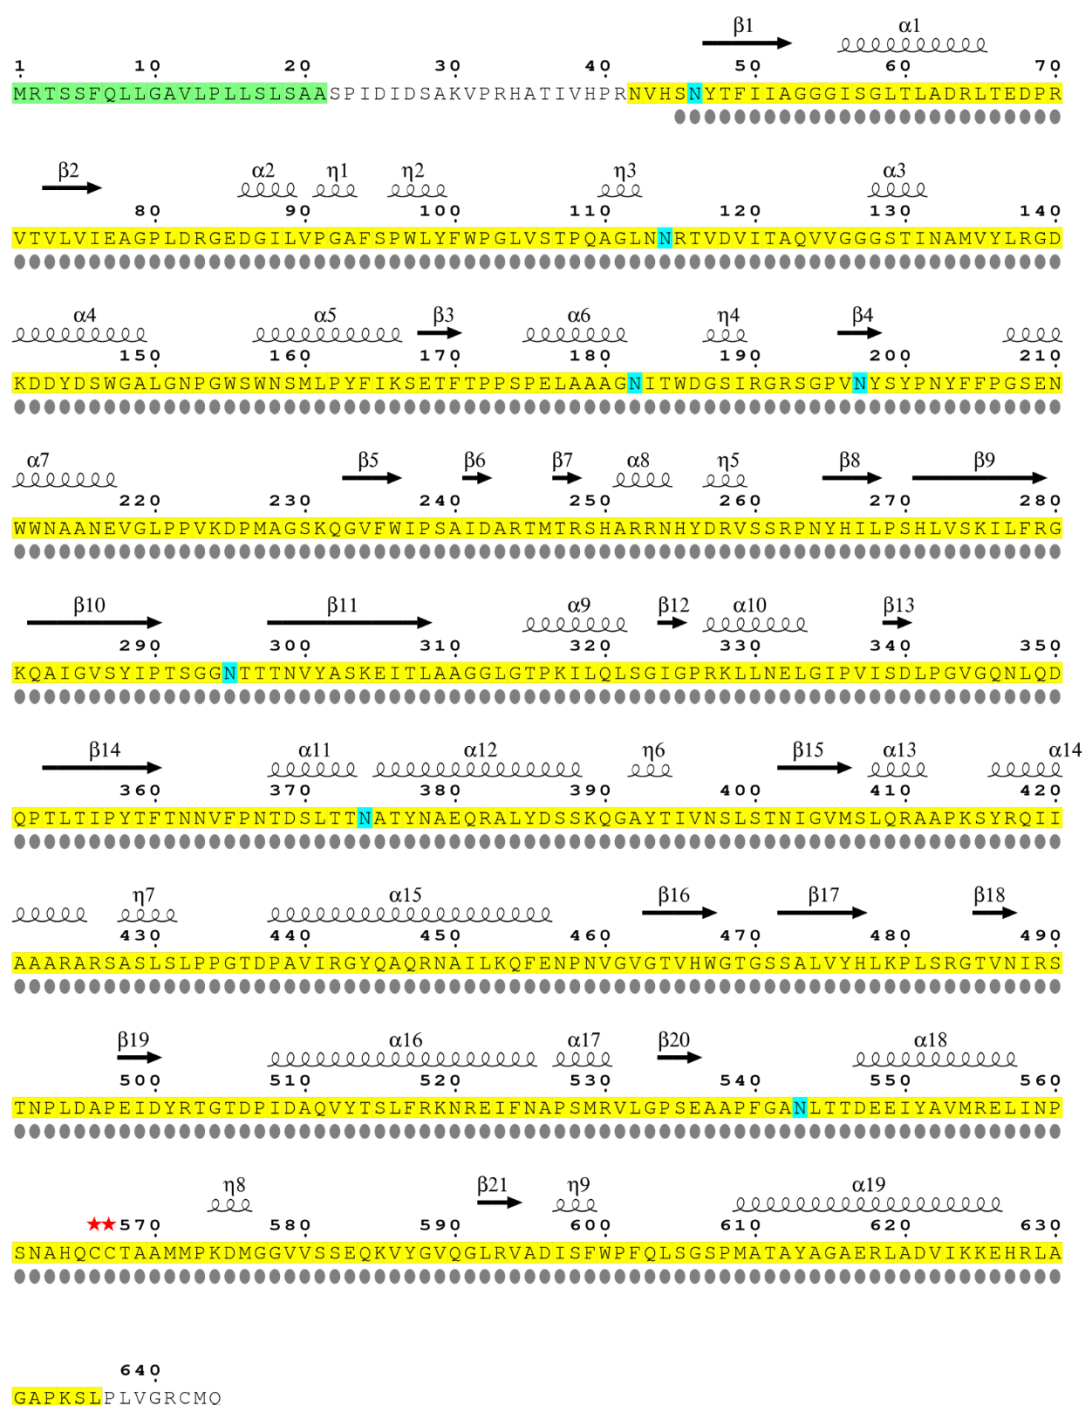

**Figure S2** Complete expected mature sequence of *CtFDO* with highlighted sequence parts confirmed with liquid chromatography-mass spectrometry (LC-MS/MS, yellow background) and with *CtFDO* crystal structures (grey dots). The sequence part with green background correspond to the signal peptide. Residues highlighted by cyan background mark the N-glycosylation sites in *CtFDO*. The red stars mark the only disulphide bridge. For the LC-MS/MS, the deglycosylated sample of *CtFDO* was digested by pepsin. Fragments were analysed by LC-MS/MS using an electrospray ion source of a 15T solariX XR FT-ICR mass spectrometer (Bruker Daltonics). Mass spectrometer was operated in positive, data dependent mode. Data were processed using the DataAnalysis 4.2 software and exported to mgf format. The fragments were identified by ProteinScape (Bruker Daltonics) with the Mascot search engine.

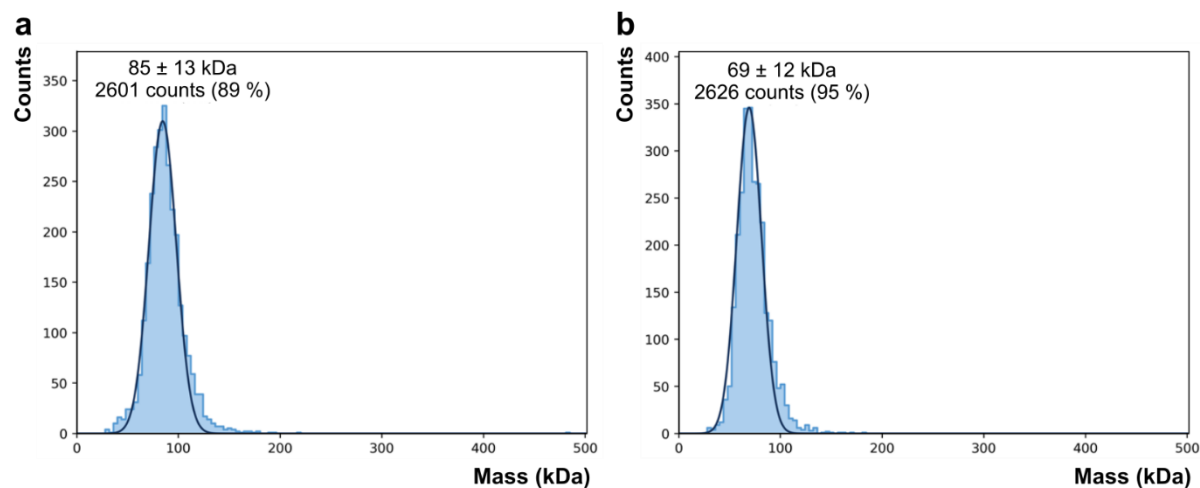

**Figure S3** Mass distribution analysis done using mass photometry with (a) glycosylated and (b) deglycosylated form of *CtFDO* (*CtFDO<sub>deg1</sub>*). Graphs show a single peak for *CtFDO* and *CtFDO<sub>deg1</sub>* corresponding to 85 and 69 kDa containing more than 89 and 95 % of the population, respectively. No other oligomeric form was found. Data were collected on a Refeyn OneMP instrument using the DiscoverMP (v 2.2.1) software. Samples were diluted in 25 mM Tris-HCl with 75 mM NaCl, pH 7.5 to the concentration of 20 nM and 24 nM for *CtFDO* and *CtFDO<sub>deg1</sub>*, respectively. Data was analysed using DiscoverMP (version v. 2.3.dev12) using default settings.

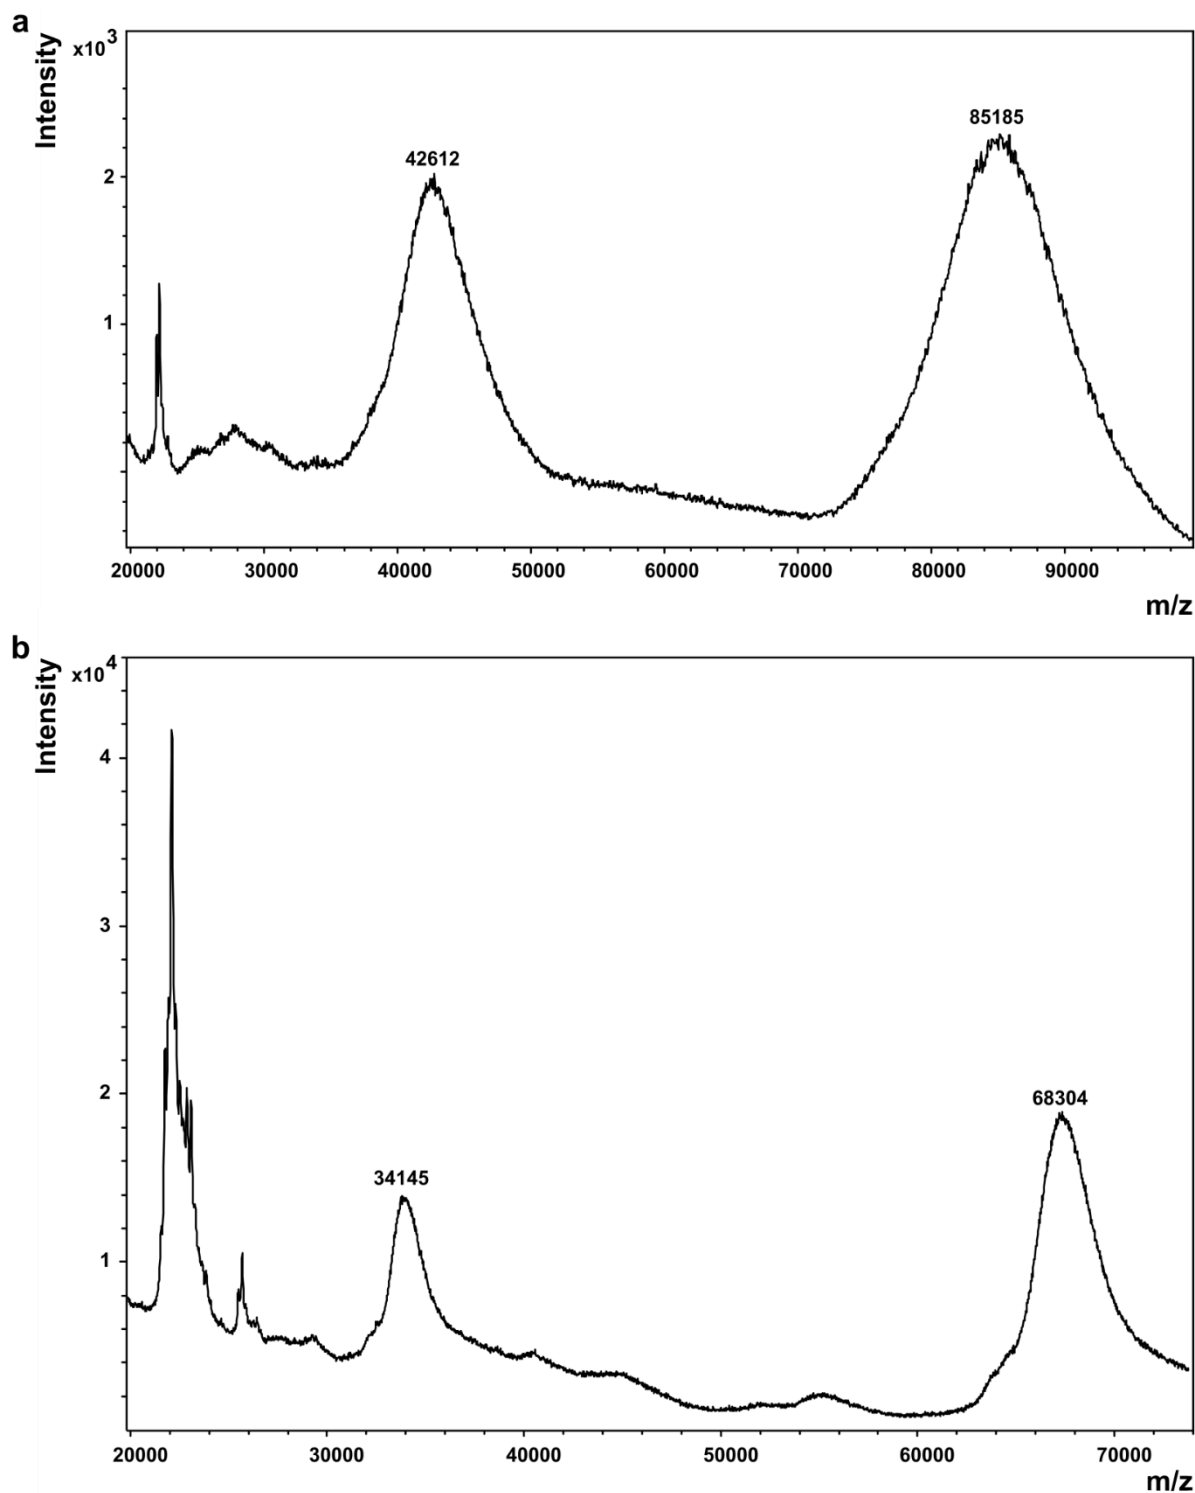

**Figure S4** MALDI-TOF spectra of *CtFDO* in (a) fully glycosylated and (b) deglycosylated form. One  $\mu\text{l}$  of sample at a concentration of  $10 \text{ pmol}\cdot\mu\text{l}^{-1}$  was applied on stainless-steel MALDI target and let dry. The sample was overlaid with  $1 \mu\text{l}$  of sinapinic acid (Sigma-Aldrich) and let dry at room temperature. Intact protein was analysed by a MALDI-TOF mass spectrometer Autoflex Speed (Bruker Daltonics) operated in linear positive mode. Data were processed by the FlexAnalysis 3.3 software (Bruker Daltonics).

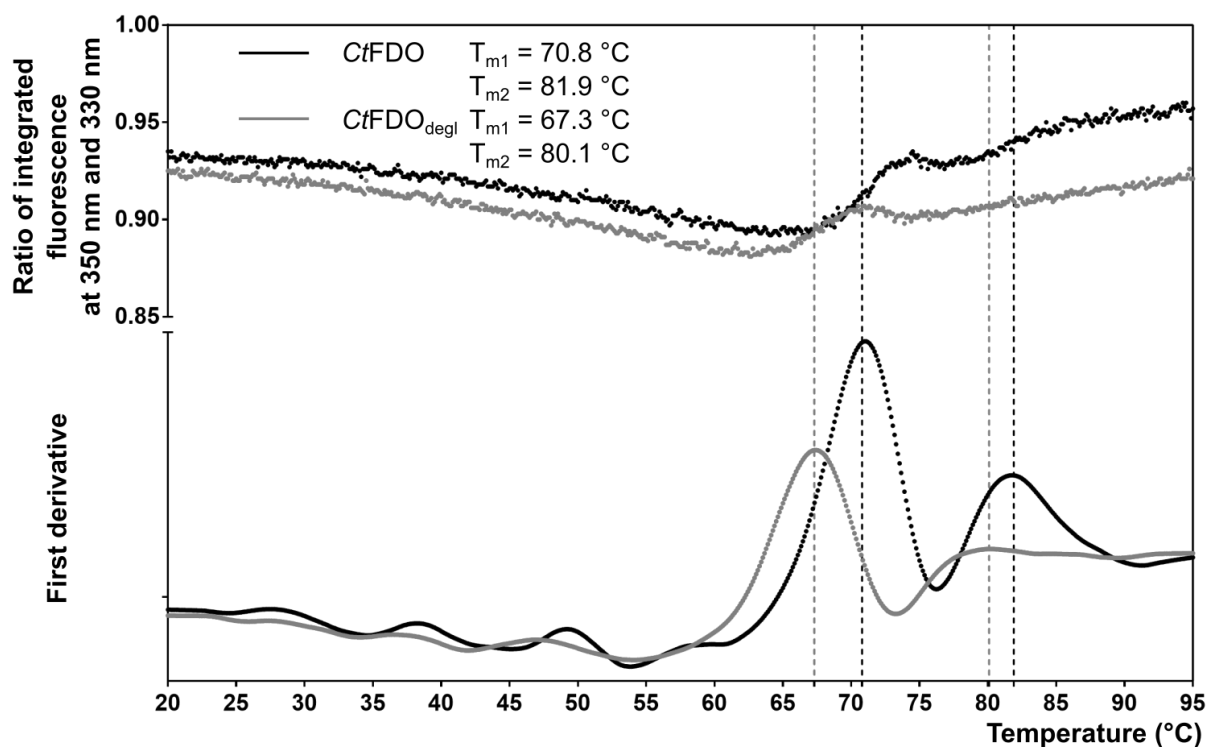

**Figure S5** Thermal stability of *CtFDO* fully glycosylated (black curve) and deglycosylated (*CtFDO<sub>deg1</sub>*) by endoglycosidase F1 (grey curve) measured by nano differential scanning fluorimetry using a Prometheus NT.48 instrument (NanoTemper). The samples of concentration approximately  $0.7 \text{ mg}\cdot\text{ml}^{-1}$  were diluted in 25 mM Tris-HCl, pH 7.5 with 100 mM NaCl. The measurements were done in temperature range 20-95°C with slope 2.5 °C per min. Difference in the height of peaks is given by a slightly different concentration of the samples. The data were evaluated with the PR.ThermControl v2.1.1 software and plotted using GraphPad Prism 7.02 (GraphPad Software).

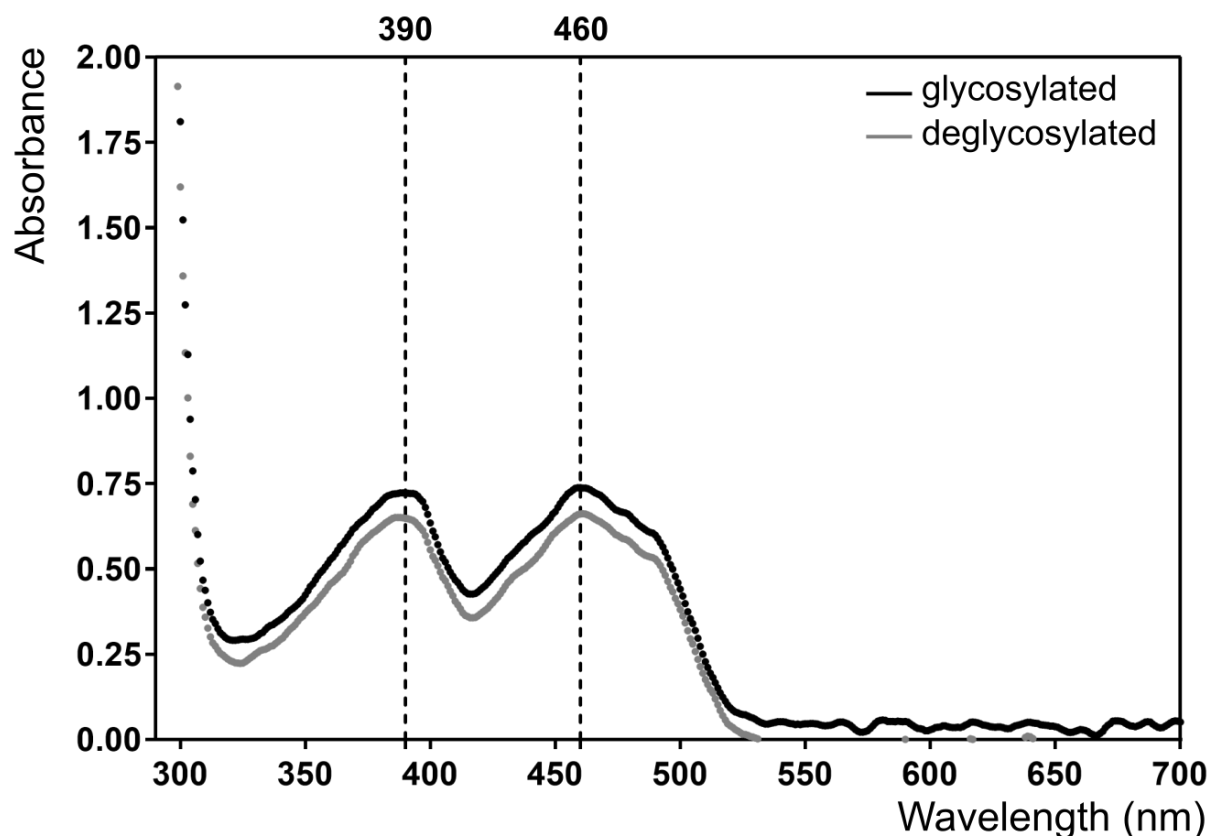

**Figure S6** The UV-VIS absorption spectra for fully glycosylated (in black) and deglycosylated (in grey) CtFDO in solution showing two maxima at 390 nm and 460 nm. Both profiles show an oxidized state of FAD in solution (25 mM Tris-HCl with 100 mM NaCl, pH 7.5). The UV-VIS absorption spectra were measured using a DeNovix DS-11 microvolume spectrophotometer with protein concentration of approximately  $7.2 \text{ mg ml}^{-1}$ . The different height of peaks is given by varied concentration of the samples. The spectra were plotted with GraphPad Prism version 7.02 for Windows (GraphPad Software, La Jolla California USA, [www.graphpad.com](http://www.graphpad.com)).



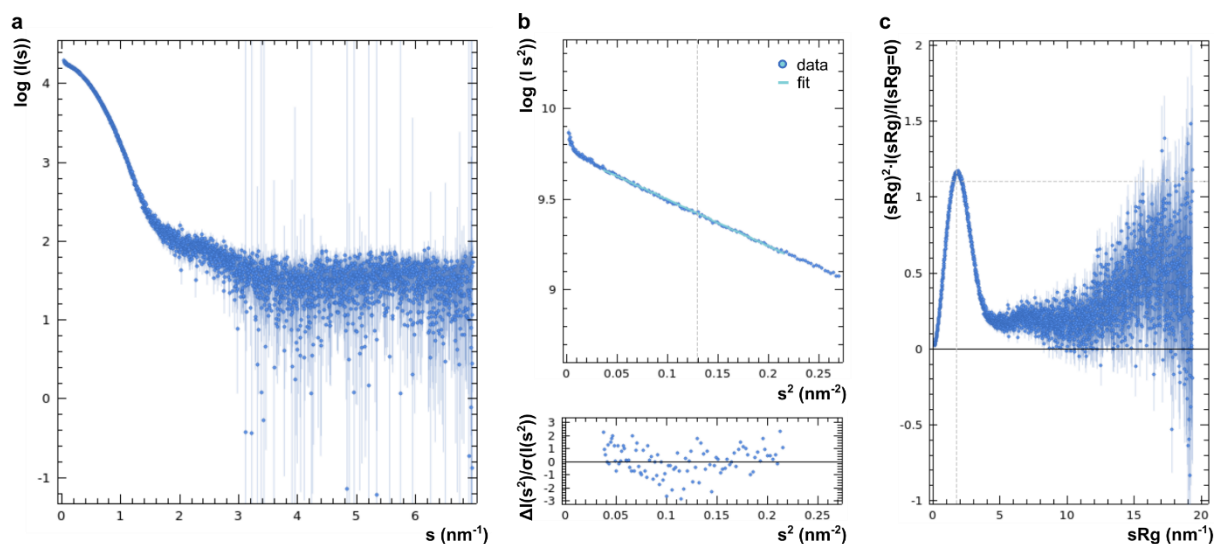

**Figure S7** The small-angle X-ray scattering (SAXS) plots obtained for deglycosylated form of CtFDO (CtFDO<sub>degl</sub>). (a) The scattering plot (b) Guinier plot, and (c) dimensionless Kratky plot with  $s$  normalized by  $Rg$  ( $2.77 \pm 0.08$ ) and  $I(sRg)$  normalized to  $sRg = 0$ . The estimated molecular weight for CtFDO<sub>degl</sub> ranges between 56 and 68 kDa depending on the calculation method (Hajizadeh *et al.*, 2018) (59 kDa based on  $Q_p$  – protein volume from the Porod invariant, 68 kDa based on  $M_0W$ , 56 kDa based on  $V_C$  – empirical Volume of Correlation). The SAXS experiment was performed in batch mode at the EMBL P12 beamline at the Petra III synchrotron radiation source (DESY, Hamburg) using a detector Pilatus 6M (Dectris, Baden-Daettwil, Switzerland). The measurement was done at 20 °C with sample-to-detector distance 3.0 m, wavelength 1.24 Å, and exposure time per image 0.045 s. The data were measured for CtFDO<sub>degl</sub> ( $4.2 \text{ mg} \cdot \text{ml}^{-1}$ ), dissolved in 25 mM Tris-HCl, pH 7.5 with 25 mM NaCl. The data were processed using the ATSAS 3.0.0 package (Manalastas-Cantos *et al.*, 2021). The data had fair quality according to the shape of the scattering curve, Guinier analysis and Kratky plot. Molecular envelope was not calculated.

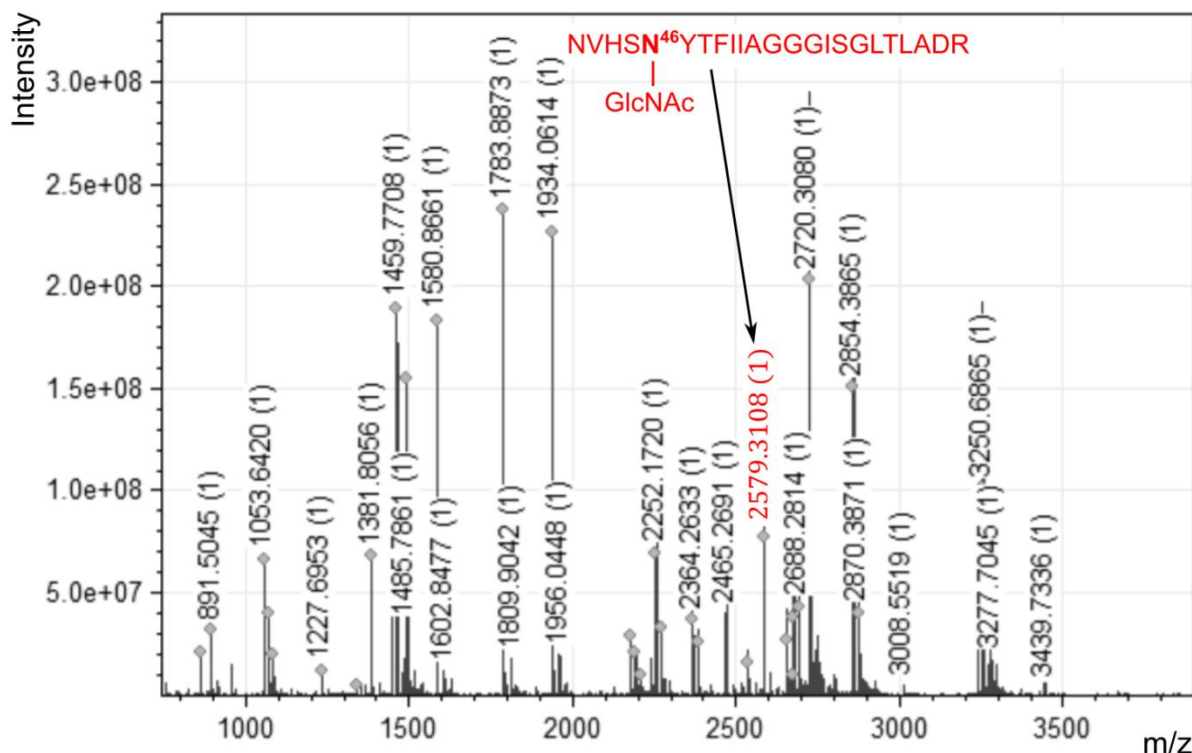

**Figure S8** Confirmation of *CtFDO* identity and presence of glycosylation site at Asn46 with MALDI-TOF peptide mass fingerprinting (PMF). The observed ion at  $m/z$  2579.3108 corresponds to peptide  $N^{42}VHSNYTFIISGGGISGLTLADR^{64}$  modified by one *N*-acetyl-D-glucosamine unit linked to Asn46. PMF was performed using a sample of *CtFDO*<sub>degl</sub> (amount of 4  $\mu$ g) loaded onto SDS gel. SDS gel bands were cut-out, chopped into small pieces, and dehydrated by acetonitrile. Dithiothreitol at a concentration of 50 mM was added to the gel pieces and let incubate at 60 °C for 30 min. Then iodoacetamide at a concentration of 100 mM was added to the gel pieces. After 30 min in dark and at room temperature, the gel pieces were washed by water and dehydrated by acetonitrile. Trypsin solution was added to the gel pieces and let incubate at 37 °C overnight. One microliter of tryptic peptide mixture was applied on the stain-less steel MALDI target, covered with  $\alpha$ -Cyano-4-hydroxycinnamic acid as a matrix and analysed by a 15T solarix XR FT-ICR mass spectrometer (Bruker Daltonics) operating in positive mode. Data were processed by the DataAnalysis 4.2 software (Bruker Daltonics) and the mMass software.

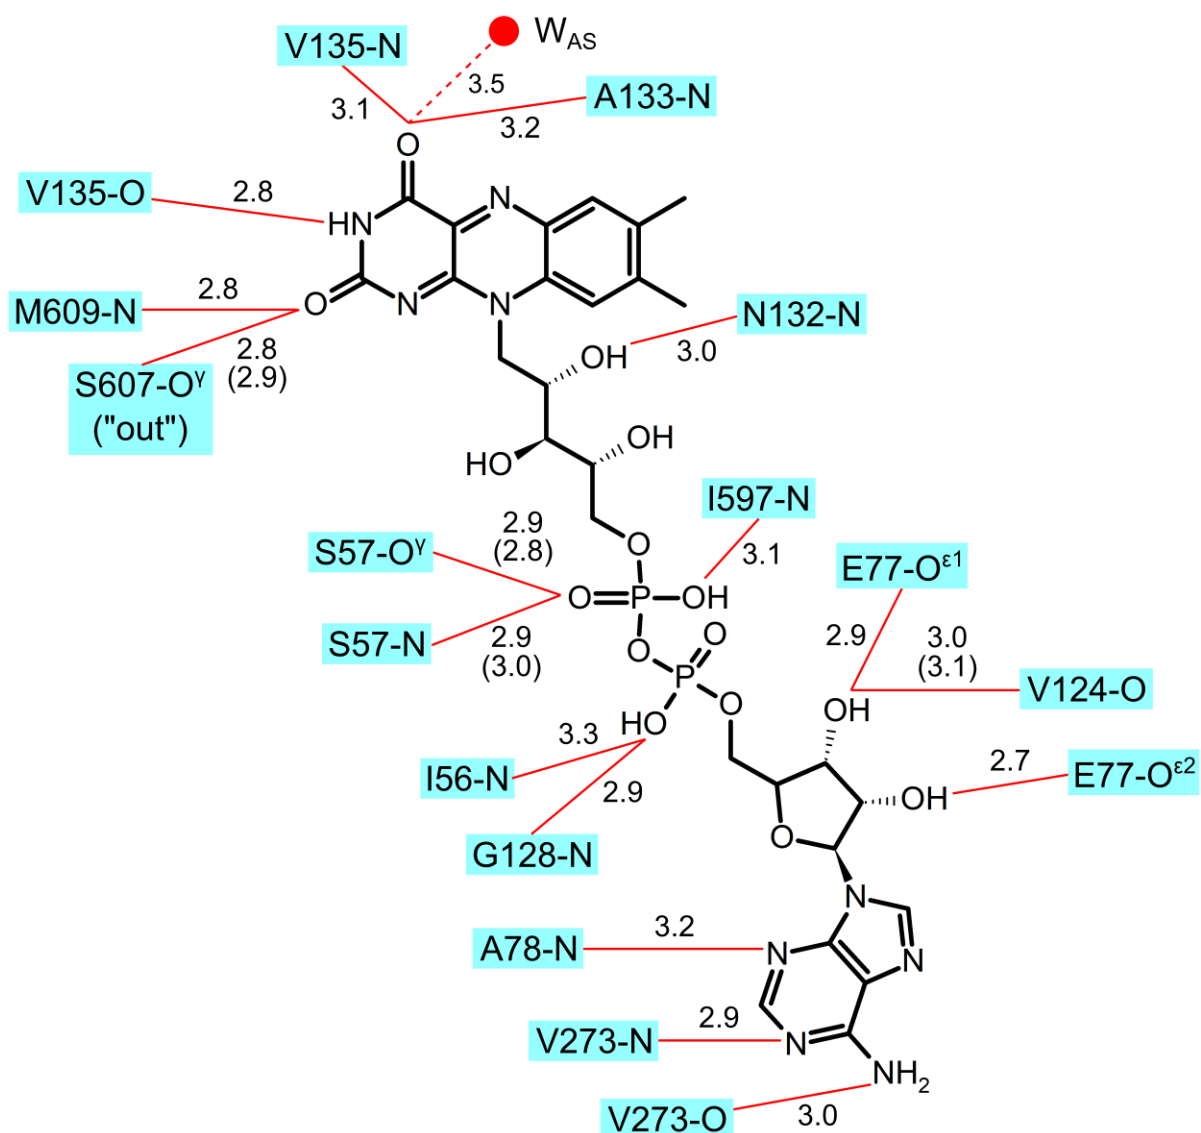

**Figure S9** Schematic diagram of the FAD interactions with *CtFDO*. Hydrogen bonds are indicated as red lines with donor-acceptor distances in Å (different values for chain B are given in parentheses). Besides the residues of *CtFDO*, the interaction with the active-site water ( $W_{AS}$ ) is indicated (red sphere).

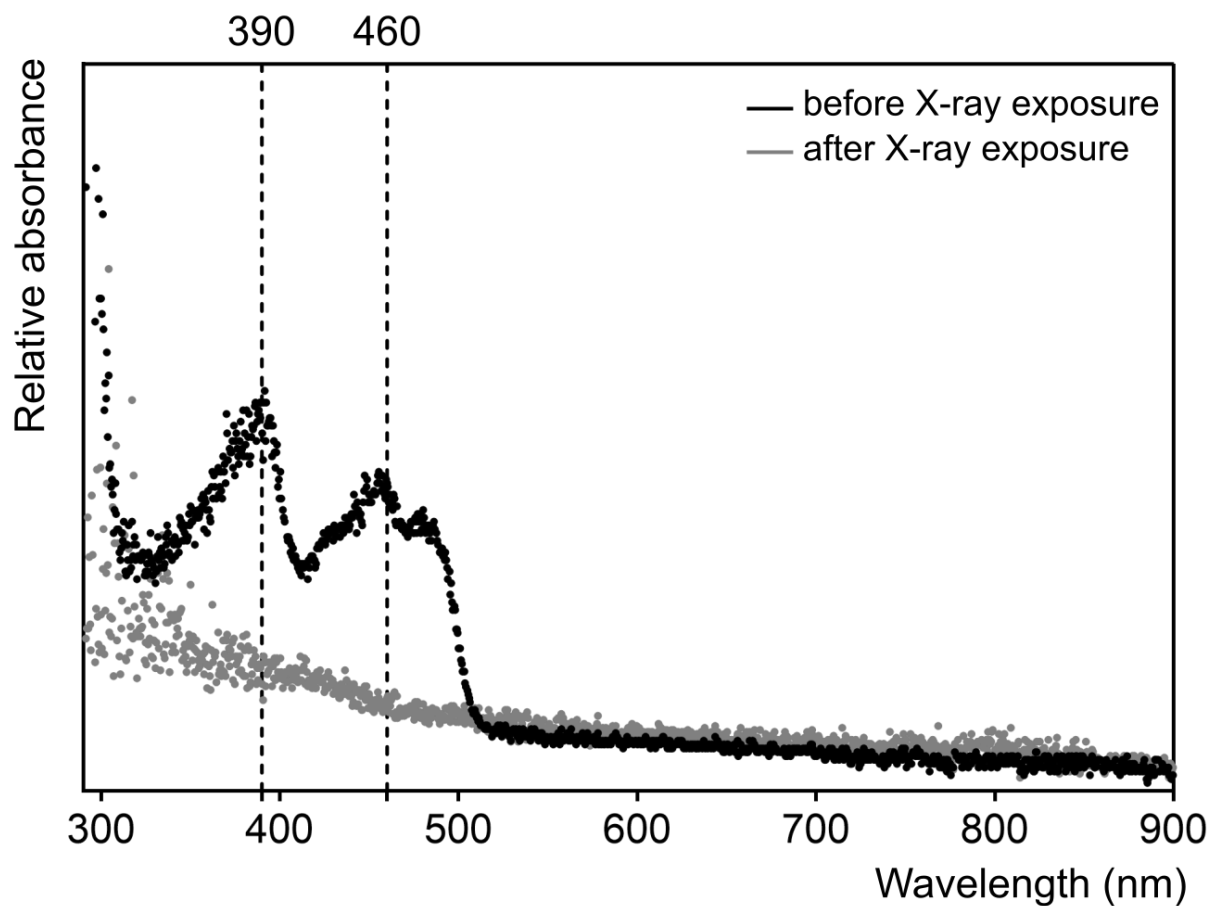

**Figure S10** The UV-VIS absorption spectra measured for *CtFDO<sub>deg1</sub>* crystal before (in black) and after (in grey) exposure to X-ray beam show the oxidized state and reduced state of FAD, respectively. The data prove reduction of FAD during exposure to X-rays. The absorption spectra were recorded with the OceanView spectroscopy software and normalized at 290 and 900 nm in GraphPad Prism version 7.02 for Windows (GraphPad Software, La Jolla California USA, [www.graphpad.com](http://www.graphpad.com)).

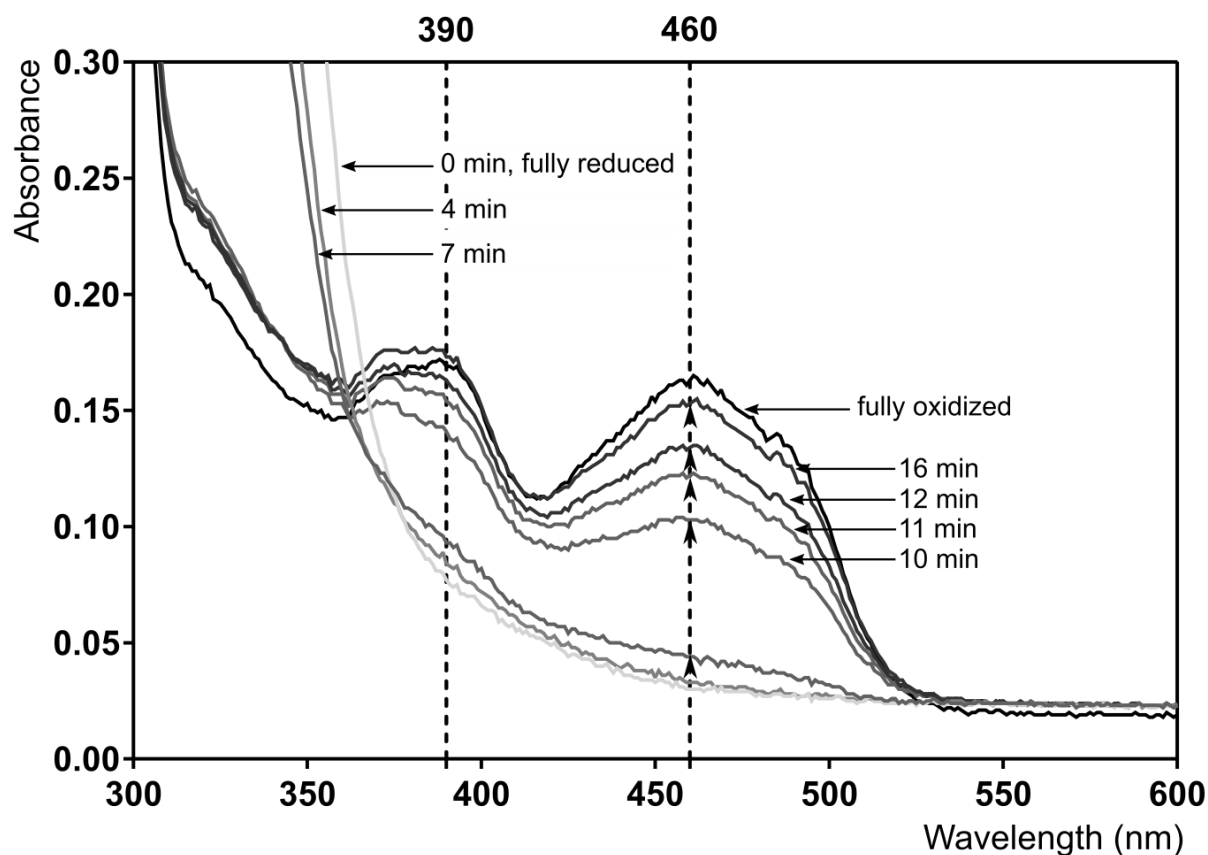

**Figure S11** UV-VIS absorption spectra of *CtFDO* reduction by dithionite (DTN) and re-oxidation by atmospheric molecular oxygen in solution. Reduced *CtFDO* lacks the flavin absorption peaks around 390 and 460 nm, typical for the oxidized state of FAD. The increased absorbance in the range of 300–360 nm corresponds to absorbance of DTN and its consumption in time. The solution was stirred by a pipette after 3 and 9 min. The re-oxidation effect was monitored with a UV/VIS spectrophotometer (Libra S22, Biochrom Ltd.) and the Resolution Spectrophotometer PC Software (Biochrom Ltd.). The spectra were buffer-subtracted. The spectra were plotted with GraphPad Prism version 7.02 for Windows (GraphPad Software, La Jolla California USA, [www.graphpad.com](http://www.graphpad.com)).

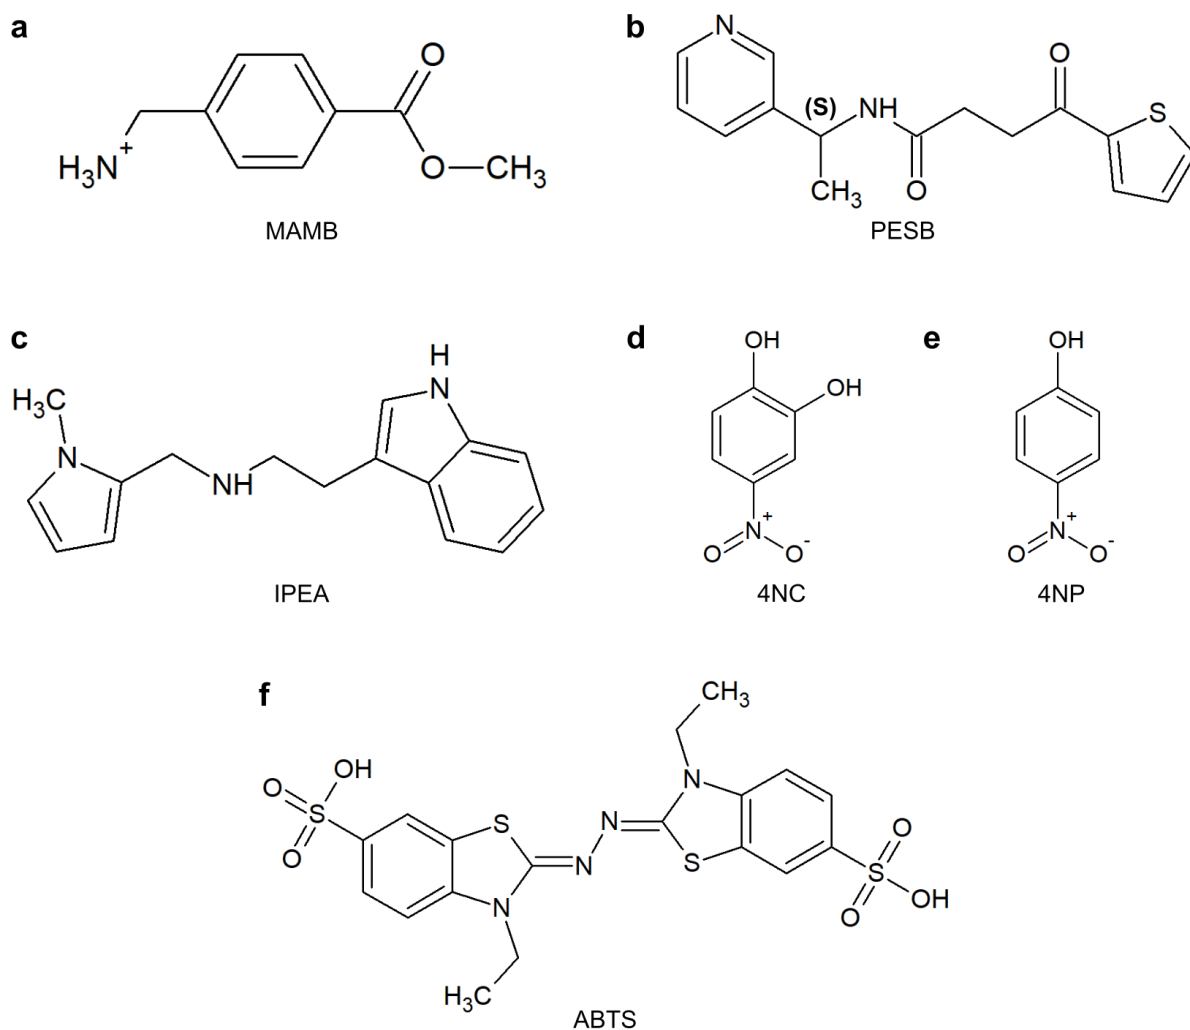

**Figure S12** Structural formulae of ligands binding in the *Ct*FDO active-site pocket. (a) methyl 4-(aminomethyl)benzoate (MAMB), (b) 4-oxo-*N*-[1-(3-pyridinyl)ethyl]-2-thiophenebutanamide (PESB), (c) 2-(1*H*-indol-3-yl)-*N*[(1-methyl-1*H*-pyrrol-2-yl)-methyl]-ethanamine (IPEA), (d) 4-nitrocatechol (4NC), (e) 4-nitrophenol (4NP), and (f) 2,2'-azino-bis(3-ethylbenzothiazoline-6-sulfonic acid) (ABTS).

**Table S1** Summary of ligands and fragments utilized for preparation of crystals of *CtFDO* complexes using soaking or co-crystallization method.

For co-crystallization, the ligand concentration is given for reservoir solution and for soaking, it is given for crystallization drop. The concentration of fragments from Frag Xtal Screen is given as amount in crystallization drop, since most of them were not completely soluble in reservoir solution. ★ marks solved structure of *CtFDO*:ligand complex.

| Ligand                               | Concentration          | Method             | Result                                      |
|--------------------------------------|------------------------|--------------------|---------------------------------------------|
| <i>Carbohydrates</i>                 |                        |                    |                                             |
| Cellobiose                           | 6-22 mM                | co-crystallization | deteriorated diffraction                    |
| D-(+)-galactose                      | 10-15 mM               | co-crystallization | ligand binding not detected                 |
| Glucose                              | 10 mM                  | co-crystallization | ligand binding not detected                 |
| Lactose                              | 15 mM                  | co-crystallization | ligand binding not detected                 |
| Rhamnose                             | 6-10 mM                | co-crystallization | deteriorated diffraction                    |
| Raffinose                            | 5 mM                   | co-crystallization | ligand binding not detected                 |
| Sucrose                              | 10 mM                  | co-crystallization | ligand binding not detected                 |
| Maltose                              | 15 mM                  | co-crystallization | ligand binding not detected                 |
| Na-L-ascorbic acid                   | 20 mM                  | co-crystallization | ligand binding not detected                 |
| D-sorbitol                           | 20 mM                  | co-crystallization | deteriorated diffraction                    |
| <i>Lignin constituents</i>           |                        |                    |                                             |
| Guaiacylglycerol-beta-guaiacyl ether | 10 mM                  | soaking (1 h)      | ligand binding not detected                 |
| Caffeic acid                         | 18 mM                  | co-crystallization | ligand binding not detected                 |
| Cinnamyl alcohol                     | 22 mM in 0.6 % ethanol | co-crystallization | ligand binding not detected                 |
| p-coumaric acid                      | 20 mM                  | co-crystallization | ligand binding not detected                 |
| 4-methoxybenzyl alcohol              | 25 mM in 10 % ethanol  | co-crystallization | ligand binding not detected                 |
| 4-hydroxy-3-methoxybenzyl alcohol    | 15 mM                  | co-crystallization | ligand binding not detected                 |
| <i>Aliphatic alcohols</i>            |                        |                    |                                             |
| Crotyl alcohol                       | 20 mM                  | co-crystallization | ligand binding not detected                 |
| Choline                              | 20 mM                  | co-crystallization | ligand binding not detected                 |
| <i>Aromatic alcohols</i>             |                        |                    |                                             |
| o-phenylenediamine                   | 10 mM                  | soaking (4–6 min)  | ligand binding not detected                 |
| Aminophenol                          | 10 mM                  | soaking (5 min)    | ligand binding not detected                 |
| 4-nitrophenol                        | 20 mM                  | co-crystallization | ★ <i>CtFDO</i> :4NP (PDB entry: 6ze7)       |
| 2-phenylethanol                      | 20 mM                  | co-crystallization | ligand binding not detected                 |
| 3-phenyl-1-propanol                  | 5 mM                   | soaking (3 s)      | crystal damage, ligand binding not detected |
| <i>Aromatic acids</i>                |                        |                    |                                             |
| Gallic acid                          | 3.5 mM                 | soaking (3 s)      | crystal damage, ligand binding not detected |

|                                                       |         |                              |                                             |
|-------------------------------------------------------|---------|------------------------------|---------------------------------------------|
| Ellagic acid                                          | 5 mM    | co-crystallization           | deteriorated diffraction                    |
| <i>Dyes</i>                                           |         |                              |                                             |
| 2,6-dichloroindophenol                                | 0.12 mM | co-crystallization           | ligand binding not detected                 |
| <i>Reducing agents</i>                                |         |                              |                                             |
| Potassium ferrocyanide                                | 20 mM   | co-cryst., soaking (2–4 min) | ligand binding not detected                 |
| Dithionite                                            | 10 mM   | soaking (10 s)               | crystal damage,<br>deteriorated diffraction |
| <i>AMP containing ligand</i>                          |         |                              |                                             |
| Adenosine monophosphate                               | 20 mM   | co-crystallization           | deteriorated diffraction                    |
| Nicotinamide adenine dinucleotide                     | 60 mM   | co-crystallization           | ligand binding not detected                 |
| <i>Others</i>                                         |         |                              |                                             |
| 5-hydroxymethyl furfural                              | 10 mM   | soaking (2–4 min)            | ligand binding not detected                 |
| Cystamine                                             | 20 mM   | co-crystallization           | ★ <i>Ct</i> FDO:free (PDB entry: 6ze2)      |
| 2,2'-azino-bis(3-ethylbenzothiazoline-6-sulfonic acid | 8.5 mM  | co-crystallization           | ★ <i>Ct</i> FDO:ABTS (PDB entry 7aa2)       |
| Fluvastatin                                           | 1.3 mM  | soaking (1–2 min)            | ligand binding not detected                 |
| Eltrombopag                                           | 0.5 mM  | soaking (1 min)              | ligand binding not detected                 |
| AZD-8055                                              | 0.5 mM  | soaking (1 min)              | ligand binding not detected                 |
| Triamcinolone                                         | 1.3 mM  | soaking (2 min)              | ligand binding not detected                 |
| <i>Frag Xtal Screen (Jena Bioscience)</i>             |         |                              |                                             |
| <i>order (place in the 96-well plate)</i>             |         | Amount in drop               |                                             |
| FRS-3 (A3)                                            | 50 µmol | soaking (70 h)               | ligand binding not detected                 |
| FRS-6 (A6)                                            | 50 µmol | soaking (3.5–24 h)           | ligand binding not detected                 |
| FRS-7 (A7)                                            | 50 µmol | soaking (3–7 h)              | ligand binding not detected                 |
| FRS-9 (A9)                                            | 50 µmol | soaking (20 h)               | ligand binding not detected                 |
| FRS-10 (A10)                                          | 50 µmol | soaking (17 h)               | ligand binding not detected                 |
| FRS-12 (A12)                                          | 50 µmol | soaking (70 h)               | deteriorated diffraction                    |
| FRS-16 (B4)                                           | 50 µmol | soaking (2.5–70 h)           | ligand binding not detected                 |
| FRS-18 (B6)                                           | 50 µmol | soaking (70 h)               | ligand binding not detected                 |
| FRS-24 (B12)                                          | 50 µmol | soaking (3–17 h)             | ★ <i>Ct</i> FDO:PESB (PDB entry: 6ze4)      |
| FRS-28 (C4)                                           | 50 µmol | soaking (3–21 h)             | ligand binding not detected                 |
| FRS-29 (C5)                                           | 50 µmol | soaking (70 h)               | ligand binding not detected                 |
| FRS-32 (C8)                                           | 50 µmol | soaking (2.5 h)              | ★ <i>Ct</i> FDO:8G2 (PDB entry: 6ze3)       |
| FRS-35 (C11)                                          | 50 µmol | soaking (70 h)               | ★ <i>Ct</i> FDO:IPEA (PDB entry: 6ze5)      |
| FRS-36 (C12)                                          | 50 µmol | soaking (3–22 h)             | deteriorated diffraction                    |



---

|              |                    |                      |                                      |
|--------------|--------------------|----------------------|--------------------------------------|
| FRS-38 (D2)  | 50 $\mu\text{mol}$ | soaking (2.5–24 h)   | deteriorated diffraction             |
| FRS-39 (D3)  | 50 $\mu\text{mol}$ | soaking (21 h)       | ligand binding not detected          |
| FRS-41 (D5)  | 50 $\mu\text{mol}$ | soaking (2.5–24 h)   | deteriorated diffraction             |
| FRS-42 (D6)  | 50 $\mu\text{mol}$ | soaking (3 h)        | ligand binding not detected          |
| FRS-43 (D7)  | 50 $\mu\text{mol}$ | soaking (2.5–24 h)   | deteriorated diffraction             |
| FRS-47 (D11) | 50 $\mu\text{mol}$ | soaking (21 h)       | deteriorated diffraction             |
| FRS-48 (D12) | 50 $\mu\text{mol}$ | soaking (17 h)       | ligand binding not detected          |
| FRS-49 (E1)  | 50 $\mu\text{mol}$ | soaking (21 h)       | ligand binding not detected          |
| FRS-52 (E4)  | 50 $\mu\text{mol}$ | soaking (21 h)       | ligand binding not detected          |
| FRS-57 (E9)  | 50 $\mu\text{mol}$ | soaking (21 h)       | ligand binding not detected          |
| FRS-59 (E11) | 50 $\mu\text{mol}$ | soaking (21 h)       | deteriorated diffraction             |
| FRS-62 (F2)  | 50 $\mu\text{mol}$ | soaking (21 h)       | ligand binding not detected          |
| FRS-65 (F5)  | 50 $\mu\text{mol}$ | soaking (3.5 h)      | ligand binding not detected          |
| FRS-67 (F7)  | 50 $\mu\text{mol}$ | soaking (3.5–24 h)   | ligand binding not detected          |
| FRS-69 (F9)  | 50 $\mu\text{mol}$ | soaking (21 h)       | ligand binding not detected          |
| FRS-70 (F10) | 50 $\mu\text{mol}$ | soaking (3.5–24 h)   | ligand binding not detected          |
| FRS-72 (F12) | 50 $\mu\text{mol}$ | soaking (3.5–24 h)   | ligand binding not detected          |
| FRS-74 (G2)  | 50 $\mu\text{mol}$ | soaking (16.5–17 h)  | ligand binding not detected          |
| FRS-77 (G5)  | 50 $\mu\text{mol}$ | soaking (3.5–24 h)   | ligand binding not detected          |
| FRS-78 (G6)  | 50 $\mu\text{mol}$ | soaking (20 h)       | ligand binding not detected          |
| FRS-80 (G8)  | 50 $\mu\text{mol}$ | soaking (17 h)       | ligand binding not detected          |
| FRS-81 (G9)  | 50 $\mu\text{mol}$ | soaking (21 h)       | deteriorated diffraction             |
| FRS-82 (G10) | 50 $\mu\text{mol}$ | soaking (17 h, 20 h) | ★ <i>CtFDO:4NC</i> (PDB entry: 6ze6) |
| FRS-88 (H4)  | 50 $\mu\text{mol}$ | soaking (21 h)       | deteriorated diffraction             |
| FRS-90 (H6)  | 50 $\mu\text{mol}$ | soaking (17 h)       | ligand binding not detected          |
| FRS-91 (H7)  | 50 $\mu\text{mol}$ | soaking (3.5–24 h)   | ligand binding not detected          |
| FRS-92 (H8)  | 50 $\mu\text{mol}$ | soaking (17 h)       | ligand binding not detected          |
| FRS-94 (H10) | 50 $\mu\text{mol}$ | soaking (20 h)       | ligand binding not detected          |

**Table S2** Summary of substrates tested for C<sub>t</sub>FDO activity.

<sup>a</sup> The reaction was run in Britton-Robinson buffer pH 3.5-9.8 with 0.25 µg of C<sub>t</sub>FDO for at 45 °C for 20 min. <sup>b</sup> The reaction was run in 100 mM phosphate buffer with 30 mM NaCl pH 4.5-9 with 2 µg of C<sub>t</sub>FDO at 37 °C for 20 min. <sup>c</sup> The reaction as in <sup>a</sup> was run with 0.5 µg of C<sub>t</sub>FDO. <sup>d</sup> The reaction as in <sup>b</sup> was run at 45 °C. For compounds included in high-throughput activity screening see Supporting information 2.

| Substrate                                      | [Substrate] in solution | pH                           |
|------------------------------------------------|-------------------------|------------------------------|
| <i>Carbohydrates</i>                           |                         |                              |
| Glucose <sup>b</sup>                           | 5 mM                    | 4.5, 6.0, 8.0                |
| L-Rhamnose <sup>b</sup>                        | 5 mM                    | 4.5, 6.0, 8.0                |
| Cellobiose <sup>b</sup>                        | 5 mM                    | 4.5, 6.0, 8.0                |
| Lactose <sup>b</sup>                           | 5 mM                    | 4.5, 6.0, 8.0                |
| <i>Aliphatic alcohols - saturated</i>          |                         |                              |
| 1,4-butanediol <sup>a</sup>                    | 5 mM                    | 3.5, 5.4, 7.1, 8.0           |
| <i>Aliphatic alcohols - unsaturated</i>        |                         |                              |
| Crotyl alcohol <sup>b</sup>                    | 100 mM                  | 5.0, 6.0, 8.0                |
| <i>Aromatic alcohols</i>                       |                         |                              |
| Phenol <sup>b</sup>                            | 5 mM                    | 5.0, 6.0, 8.0                |
| Catechol <sup>a</sup>                          | 5 mM                    | 3.5, 5.8, 6.7, 7.7, 8.9      |
| Hydroquinone <sup>b</sup>                      | 5 mM                    | 5, 6, 8                      |
| 4-nitrophenol <sup>b</sup>                     | 3.8 mM                  | 5.0, 6.0, 8.0                |
| Benzyl alcohol <sup>a</sup>                    | 5 mM                    | 3.5, 5.4, 7.1, 8.0           |
| 4-methoxybenzyl alcohol <sup>a</sup>           | 5 mM                    | 3.5, 5.4, 7.1, 8.0           |
| 4-methoxybenzyl alcohol <sup>b</sup>           | 50 mM                   | 4.5, 5.0, 6.0, 7.0, 8.0, 9.0 |
| 4-hydroxy-3-methoxybenzyl alcohol <sup>a</sup> | 5 mM                    | 3.5, 5.4, 7.1, 8.0           |
| Cinnamyl alcohol <sup>b</sup>                  | 5 mM                    | 5.0, 6.0, 8.0                |
| p-coumaryl alcohol <sup>b</sup>                | 9.5 mM                  | 4.5, 6, 8                    |
| Coniferyl alcohol <sup>a</sup>                 | 5 mM                    | 3.5, 5.4, 7.1, 8.0           |
| 2-phenyl ethanol <sup>b</sup>                  | 4.4 mM                  | 5.0, 6.0, 8.0                |
| 3-phenyl-1-propanol <sup>a</sup>               | 5 mM                    | 3.5, 5.4, 7.1, 8.0           |
| 2,6-dimethoxyphenol <sup>a</sup>               | 5 mM                    | 3.5, 5.8, 6.7, 7.7, 8.9      |
| <i>Aldehydes</i>                               |                         |                              |
| 4-anisaldehyd <sup>a</sup>                     | 4.3 mM                  | 3.5, 5.4, 7.1, 8.0           |
| <i>Vitamins</i>                                |                         |                              |
| Pyridoxine <sup>a</sup>                        | 5 mM                    | 3.7, 5.4, 7.1, 7.4, 8.0      |
| <i>Others</i>                                  |                         |                              |
| Choline <sup>a</sup>                           | 5 mM                    | 3.5, 5.4, 7.1, 8.0           |
| 5-(hydroxymethyl)furfural <sup>a</sup>         | 5 mM                    | 3.5, 5.8, 6.7, 7.7, 8.9      |
| Guiacyl-glycerol-guiacyl ether <sup>a</sup>    | 2.4 mM                  | 3.5, 5.4, 7.1, 8.0           |
| Tannic acid <sup>b</sup>                       | 5 mM                    | 5.0, 7.0                     |
| ABTS <sup>c</sup>                              | 5 mM                    | 4.5, 5.4, 6.1, 7.1, 8.0, 8.9 |
| Tetracycline <sup>d</sup>                      | 27 mM                   | 4.5, 5.0, 6.0, 7.0, 8.0      |
| Bilirubin <sup>b</sup>                         | 200 µM                  | 8.0                          |
| Dithiotreitol <sup>b</sup>                     | 5 mM                    | 5.0, 8.0                     |

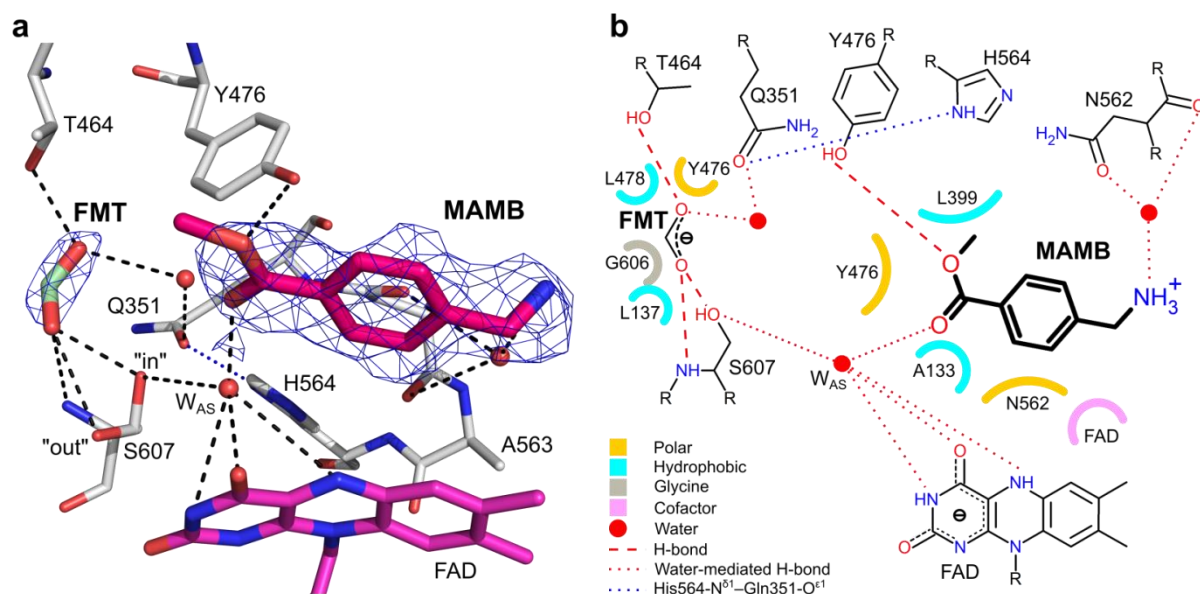

**Figure S13** The active-site pocket of *CtFDO:MAMB* (PDB entry: 6ZE3). (a) Simulated-annealing  $2mF_o - DF_c$  composite omit map shown for the formic acid (FMT) and MAMB molecules contoured at  $1\sigma$  level (calculated in Phenix Terwilliger *et al.*, 2008). The amino acid residues, MAMB, flavin, and FMT are shown as sticks with carbon coloured in grey, hotpink, magenta, and palegreen, respectively. The cofactor is shown as FADH<sup>-</sup> form, but it cannot be excluded that it is FADH<sub>2</sub>. The water molecules (red spheres) are shown with up to four most probable hydrogen bonds. The active-site water is labelled W<sub>AS</sub>. The dashed lines mark hydrogen bonds and the blue dotted line marks the hydrogen bond stabilizing the position of the His564 imidazole ring. The graphics was created in Pymol Molecular Graphics System (Schrödinger). (b) 2D schematic interaction diagram of the active site of *CtFDO:MAMB*. Hydrogen bonds are indicated as dashed or dotted lines. Residues with vdW contacts are marked with semicircles.

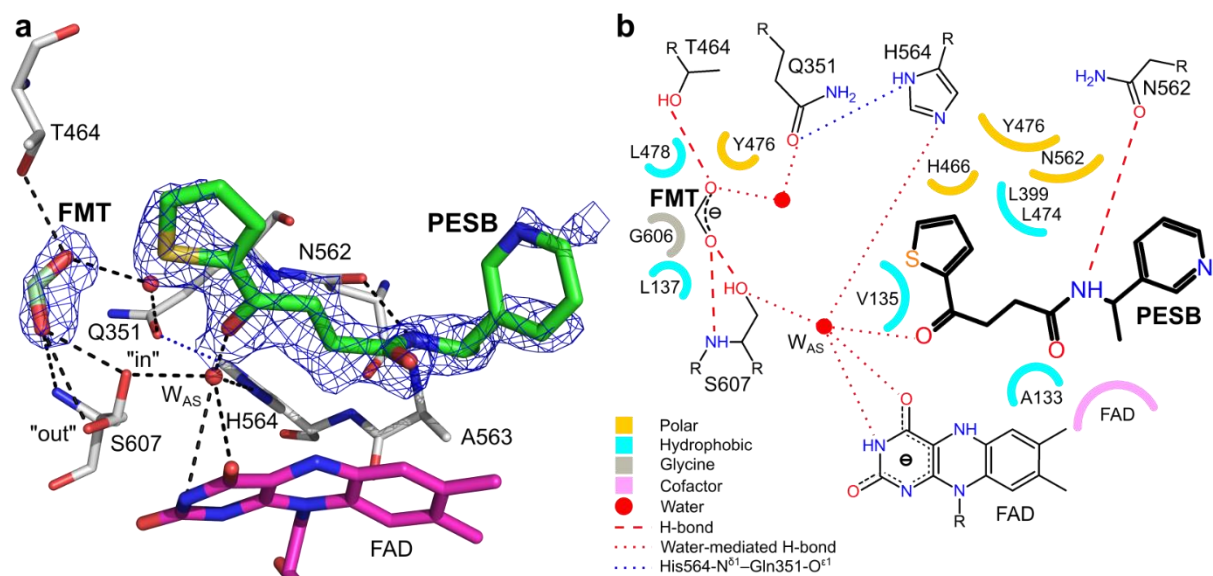

**Figure S14** The active-site pocket of *CtFDO:PESB* (PDB entry: 6ZE4, chain A). (a) Simulated-annealing  $2mF_o-DF_c$  composite omit map shown for the PESB and formic acid (FMT) molecules contoured at  $0.8\sigma$  level (calculated in Phenix, Terwilliger *et al.*, 2008). The amino acid residues, flavin, PESB, and FMT are shown as sticks with carbons coloured in grey, magenta, green, and palegreen, respectively. The water molecules are shown as red spheres, the active-site water molecule is labeled  $W_{AS}$  and is shown with all hydrophilic interactions. The dashed lines mark hydrogen bonds and the blue dotted line marks the hydrogen bond stabilizing the position of the His564 imidazole ring. The graphics was created with the Pymol Molecular Graphics System (Schrödinger). (b) 2D schematic interaction diagram of the active site of *CtFDO:PESB*. The hydrogen bonds are indicated as dashed or dotted lines. Residues with vdW contacts are marked with semicircles.

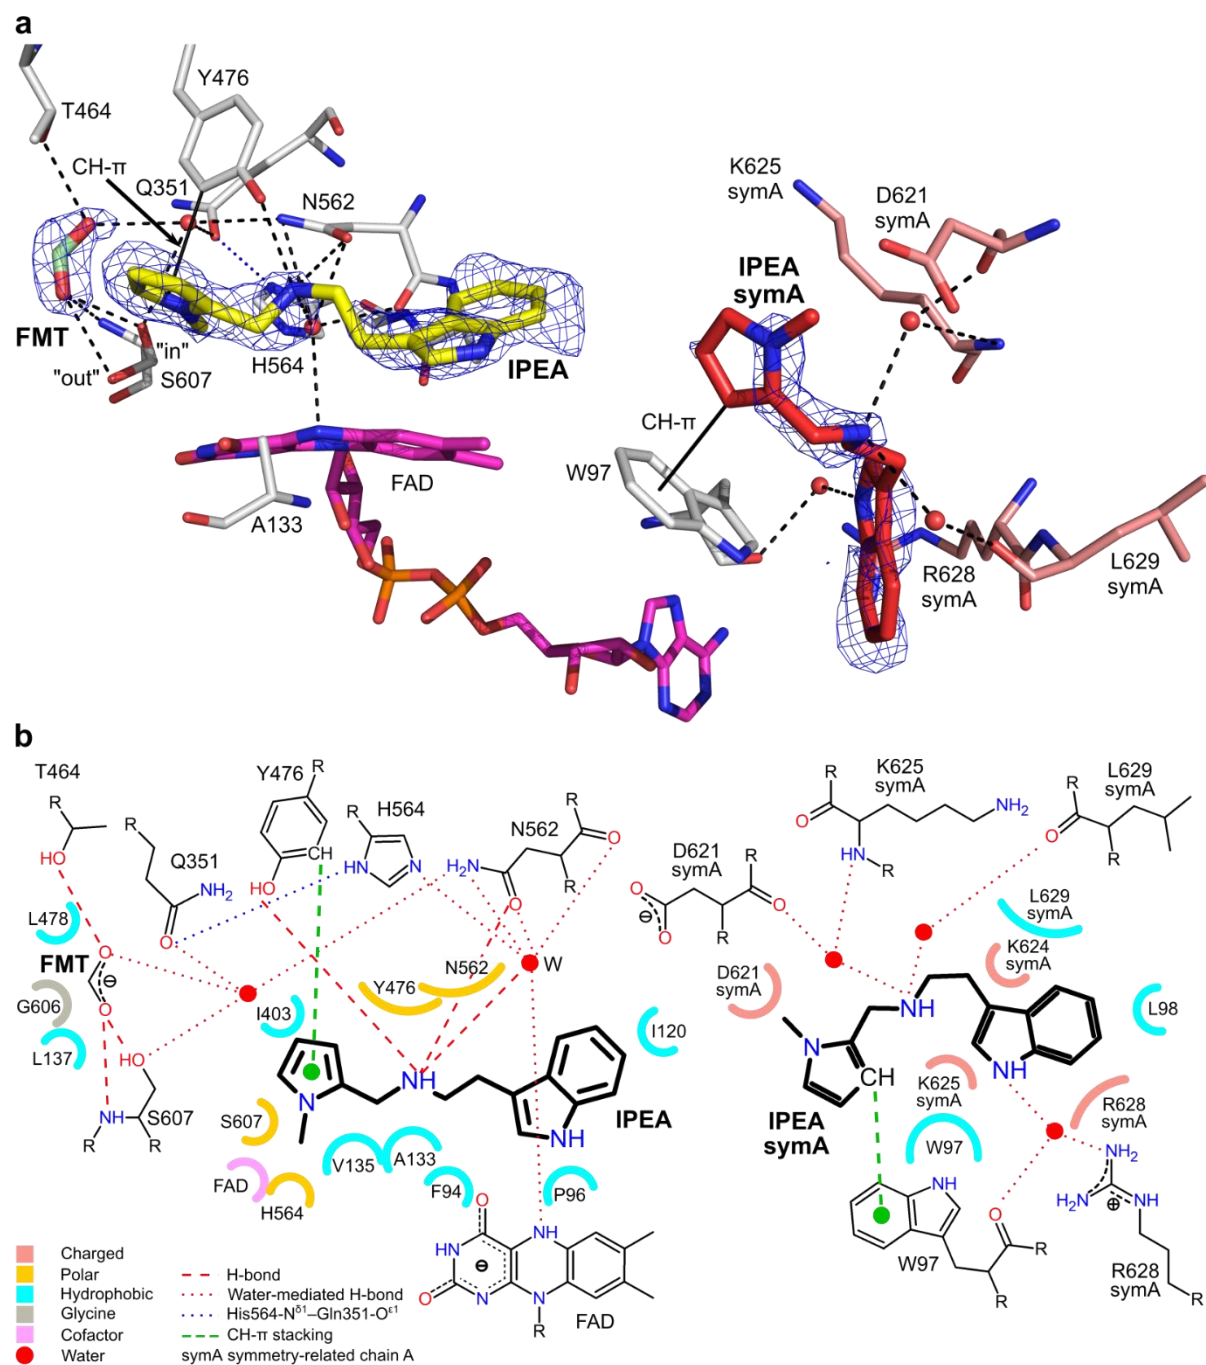

**Figure S15** The active-site pocket of *CtFDO*:IPEA (PDB entry: 6ZE5, merge of chain A and symmetry-related chain A). (a) Simulated-annealing  $2mF_o - DF_c$  composite omit map shown for the formic acid (FMT) and IPEA molecules contoured at  $1\sigma$  level (calculated in Phenix, Terwilliger *et al.*, 2008). The *CtFDO*:IPEA (residues with carbon grey) binds FMT (carbon palegreen) and IPEA (carbon yellow) in the active-site pocket and second IPEA molecule (carbon red) on the interface of symmetry-related chain A (carbon salmon) and chain A. The flavin is shown with carbon colored in magenta. The water molecules are shown as red spheres. The dashed lines, full lines, and blue dotted line mark hydrogen bonds, CH- $\pi$  interactions, and the hydrogen bond stabilizing the position of the His564 imidazole ring, respectively. The graphics was created with the Pymol Molecular Graphics System (Schrödinger). (b) 2D schematic interaction diagram of the active site of *CtFDO*:IPEA. Hydrogen bonds are indicated as dashed or dotted lines and the CH- $\pi$  interactions as green dashed lines. Residues with vdW contacts are marked with semicircles. The water molecule labelled W is shown with all hydrophilic interactions.

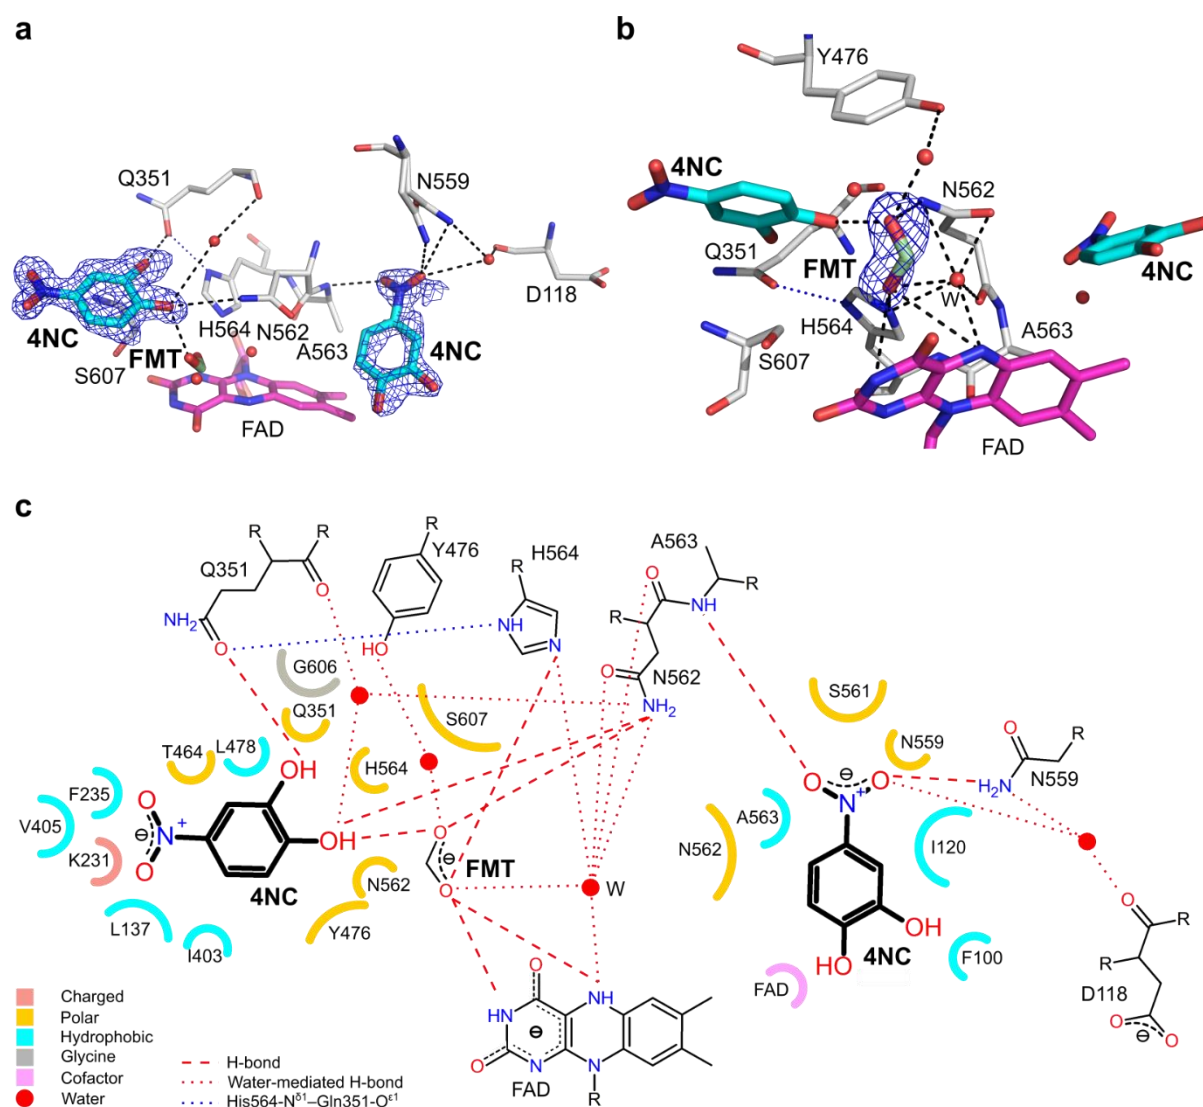

**Figure S16** The active-site pocket of *CtFDO*:4NC (PDB entry: 6ZE6, chain A). Simulated-annealing  $2mF_o - DF_c$  composite omit map shown for (a) the 4NC molecules and (b) the formic acid (FMT) molecule contoured at  $1\sigma$  level (calculated in Phenix, Terwilliger *et al.*, 2008). The complex (residues with gray carbon atoms) binds FMT (carbon palegreen) and two 4NC molecules (carbon cyan) in the active-site pocket. The cofactor is shown with carbon coloured in magenta. The water molecules (red spheres) and shown with the most probable hydrogen bonds, the water molecule labelled W is shown with all hydrophilic contacts. The dashed lines and blue dotted line mark hydrogen bonds and the hydrogen bond stabilizing the position of the His564 imidazole ring, respectively. The graphics was created with the Pymol Molecular Graphics System (Schrödinger). (c) The 2D schematic interaction diagram of the active site of *CtFDO*:4NC. Hydrogen bonds are indicated as dashed or dotted lines. Residues with vdW contacts are marked with semicircles.

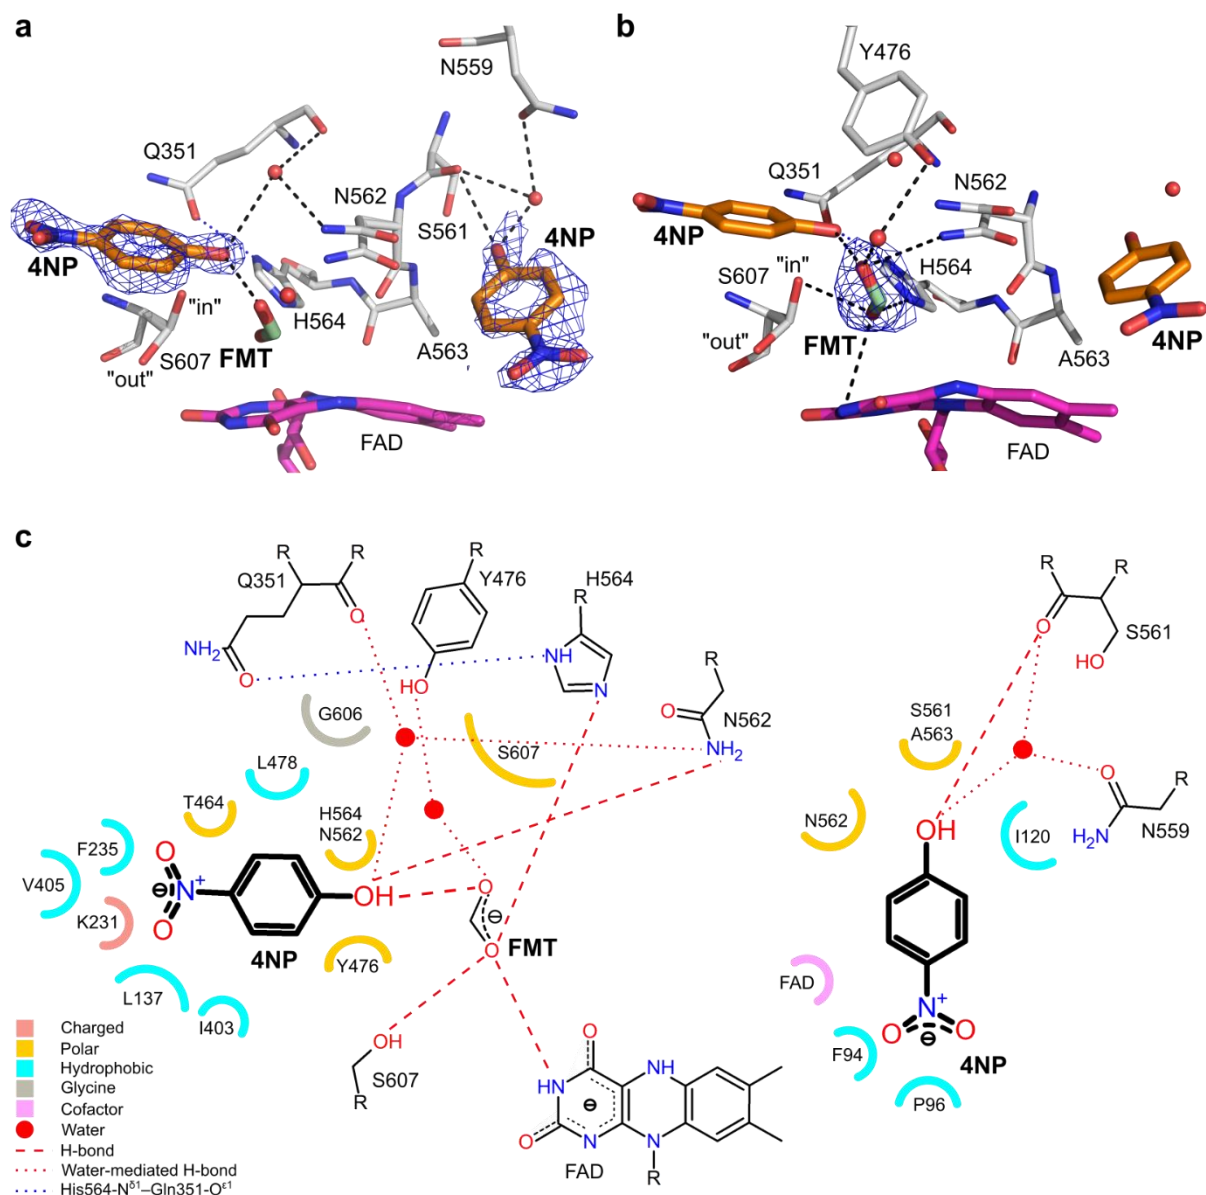

**Figure S17** The active-site pocket of *CtFDO*:4NP (PDB entry: 6ZE7, chain A). Simulated-annealing  $2mF_o - DF_c$  composite omit map shown for (a) the 4NP molecules and for (b) the FMT molecule contoured at  $0.8\sigma$  level (calculated in Phenix, Terwilliger *et al.*, 2008). The complex (chain A, residues with gray carbon atoms) binds FMT (carbon palegreen) and two 4NP molecules (carbon orange) in the active-site pocket. The cofactor is shown with magenta carbon atoms. The water molecules are shown as red spheres. The dashed lines and blue dotted line mark hydrogen bonds and the hydrogen bond stabilizing the position of the His564 imidazole ring, respectively. The graphics was created in the Pymol Molecular Graphics System (Schrödinger). (c) 2D schematic interaction diagram of the *CtFDO*:4NP. Hydrogen bonds are indicated as dashed or dotted lines. Residues with vdW contacts are marked with semicircles.

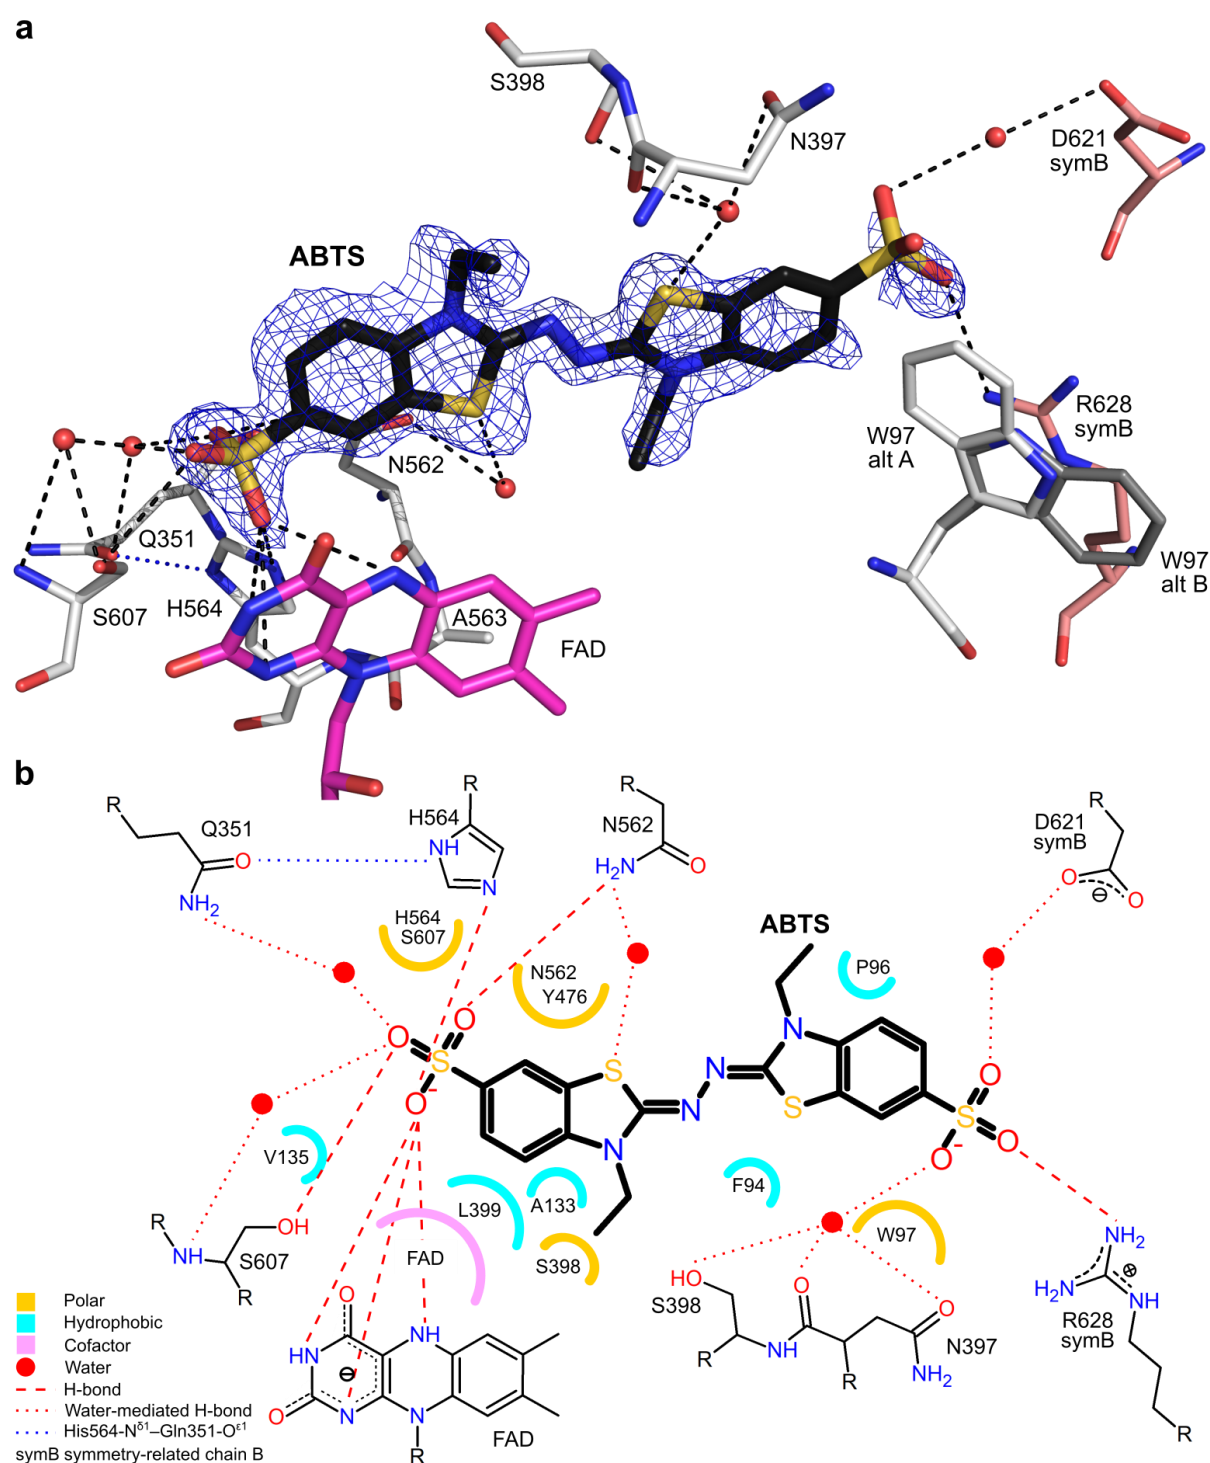

**Figure S18** The active-site pocket of *CtFDO:ABTS* (PDB entry: 7AA2, chain A). (a) Simulated-annealing  $2mF_o-DF_c$  composite omit map shown for ABTS contoured at  $1\sigma$  level (calculated in Phenix, Terwilliger *et al.*, 2008). The residues are shown with light gray carbon atoms, ABTS with carbon in black, and the cofactor in magenta. The water molecules are shown as red spheres. The dashed lines and blue dotted line mark hydrogen bonds and the hydrogen bond stabilizing the position of His564 imidazole ring, respectively. Residue Trp97 was modelled in two alternative conformations alt A (carbon light grey) and alt B (carbon gray). The graphics was created in the Pymol Molecular Graphics System (Schrödinger). (b) 2D schematic interaction diagram of the active site of *CtFDO:ABTS*. Hydrogen bonds are indicated as dashed or dotted lines. Residues with vdW contacts are marked with semicircles.



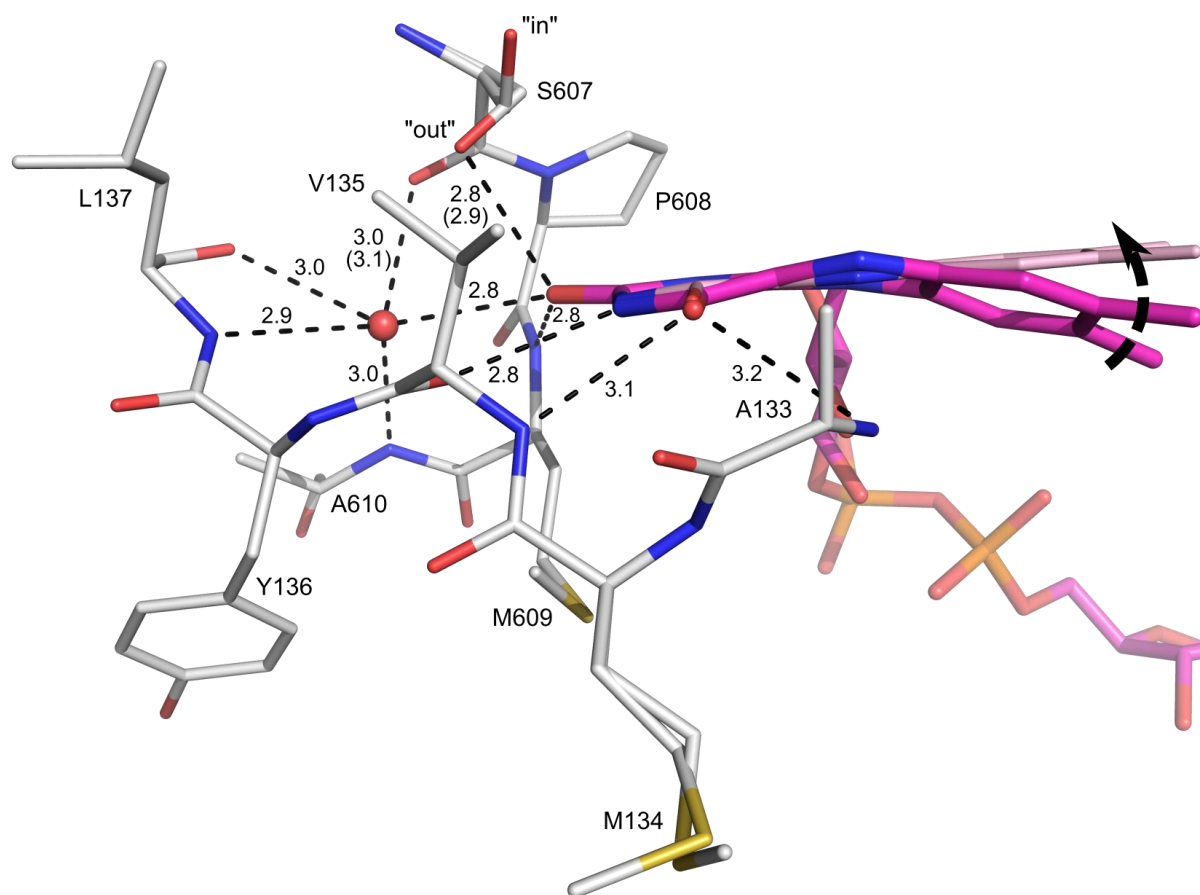

**Figure S19** The FAD pyrimidine moiety anchoring in *CtFDO* via hydrogen bonds with the main chain of the Ala133-Leu137 and Ser607-Ala610 peptides (carbon light grey) and the side chain of the “out” conformer of Ser607 (*CtFDO*:free, PDB entry: 6ZE2). The cofactor is shown with magenta carbons. The accomplishment of structural changes between the oxidized and reduced forms of the FAD isoalloxazine ring is not clear. One of the possibilities, movement of the dimethylbenzene moiety of FAD (accompanied by structural changes of the surrounding protein residues), is indicated by black arrow and theoretical conformation of planar isoalloxazine ring (carbon pink). The water molecule mediating hydrogen bonds between the FAD pyrimidine moiety and the peptides is shown as red sphere and is shown with all hydrophilic contacts. Hydrogen bonds of other atoms are indicated as dashed lines with labelled distances in Å (different values for chain B are given in parentheses). The graphics was created in Pymol Molecular Graphics System (Schrödinger).

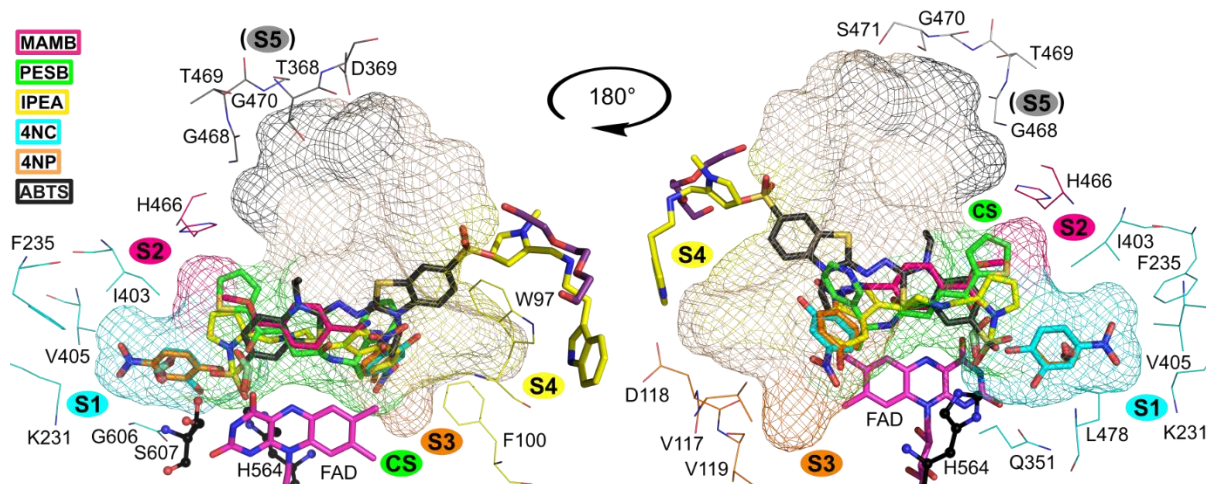

**Figure S20** Three-dimensional superposition of the active-sites of all *CtFDO* complexes (*CtFDO*:MAMB, *CtFDO*:PESB, *CtFDO*:IPEA, *CtFDO*:4NC, *CtFDO*:4NP, and *CtFDO*:ABTS). The superposed ligands are shown in the active-site pocket of *CtFDO*:free. The pocket (calculated with HOLLOW, Ho & Gruswitz, 2008) is depicted in mesh representation with highlighted catalytic site CS (green) and five sub-sites S1 (cyan), S2 (hot pink), S3 (orange), S4 (yellow), and hypothetical S5 (grey). The selected surrounding residues are shown as lines with carbon coloured by colour corresponding to the sub-site. The His-Ser pair (His564 and Ser607) is shown in ball and stick representation (carbon black). The FAD cofactor (carbon magenta), MAMB (carbon hotpink), PESB (carbon green), IPEA (carbon yellow), 4NC (carbon cyan), 4NP (carbon orange), ABTS (carbon dark grey), formic acid (carbon palegreen), and triethylene glycol (carbon purple) are shown as sticks. Molecular graphics was created using PyMOL (Schrödinger).

**Table S3** Detailed ligand interactions with the *Ct*FDO in *Ct*FDO:ligand complexes.

IPEA<sub>1</sub> and IPEA<sub>2</sub> mark IPEA binding in the active-site pocket and on the interface between two molecules of *Ct*FDO, respectively. 4NC<sub>1</sub> and 4NC<sub>2</sub> mark 4NC binding in S1 subsite and in the entrance to the pocket, respectively. 4NP<sub>1</sub> and 4NP<sub>2</sub> mark 4NC binding in S1 subsite, respectively. \* and \* mark CH- $\pi$  interaction and interaction with a residue of a symmetry related chain, respectively. The bond lengths in parentheses are given for chain B. In the case of two conformations of a residue, a range of bond lengths is given.

| hydrogen bond                                                               | Distance (Å)  | Water-mediated bond                                                             | Distance (Å)                         | Van der Waals                                                                                                            |
|-----------------------------------------------------------------------------|---------------|---------------------------------------------------------------------------------|--------------------------------------|--------------------------------------------------------------------------------------------------------------------------|
| <i>MAMB</i>                                                                 |               |                                                                                 |                                      |                                                                                                                          |
| MAMB-O-Tyr476-OH                                                            | 3.2           | MAMB-O <sup>1</sup> -W <sub>AS</sub> -FAD-N <sup>5</sup>                        | 2.5-W <sub>AS</sub> -3.5             |                                                                                                                          |
|                                                                             |               | MAMB-O <sup>1</sup> -W <sub>AS</sub> -FAD-O <sup>4</sup>                        | 2.5-W <sub>AS</sub> -2.6             |                                                                                                                          |
|                                                                             |               | MAMB-O <sup>1</sup> -W <sub>AS</sub> -FAD-N <sup>3</sup>                        | 2.5-W <sub>AS</sub> -3.2             | flavin, Ala133,<br>Leu399, Tyr476,<br>Asn562                                                                             |
|                                                                             |               | MAMB-O <sup>1</sup> -W <sub>AS</sub> -Ser607-O <sup>7</sup><br>( $\chi$ 1=-65°) | 2.5-W <sub>AS</sub> -3.5             |                                                                                                                          |
|                                                                             |               | MAMB-N-HOH-Asn562-O                                                             | 3.6-HOH-3.4                          |                                                                                                                          |
|                                                                             |               | MAMB-N-HOH-Asn562-O <sup><math>\delta</math>1</sup>                             | 3.6-HOH-3.0                          |                                                                                                                          |
| <i>PESB</i>                                                                 |               |                                                                                 |                                      |                                                                                                                          |
| PESB-N-Asn562-O <sup><math>\delta</math>1</sup>                             | 2.8           | PESB-O <sup>1</sup> -W <sub>AS</sub> -FAD-N <sup>3</sup>                        | 2.3 (2.5)-W <sub>AS</sub> -3.5 (3.3) |                                                                                                                          |
|                                                                             |               | PESB-O <sup>1</sup> -W <sub>AS</sub> -His564-N <sup>62</sup>                    | 2.3 (2.5)-W <sub>AS</sub> -3.0 (2.9) | flavin, Ala133,<br>Val135, Leu399,<br>His466, Leu474,<br>Tyr476, Asn562                                                  |
|                                                                             |               | PESB-O <sup>1</sup> -W <sub>AS</sub> -Ser607-O <sup>7</sup><br>( $\chi$ 1=-65°) | 2.3 (2.5)-W <sub>AS</sub> -2.9       |                                                                                                                          |
|                                                                             |               | PESB-O <sup>1</sup> -W <sub>AS</sub> -FAD-O <sup>4</sup>                        | 2.3 (2.5)-W <sub>AS</sub> -3.3       |                                                                                                                          |
| <i>IPEA</i>                                                                 |               |                                                                                 |                                      |                                                                                                                          |
| IPEA <sub>1</sub> -N <sup>1</sup> -Asn562-O <sup><math>\delta</math>1</sup> | 3.0 (3.2)     | IPEA <sub>1</sub> -N <sup>1</sup> -HOH-Asn562-O                                 | 2.9 (2.7)-HOH-3.0                    |                                                                                                                          |
| IPEA <sub>1</sub> -N <sup>1</sup> -Tyr476-OH                                | 2.9 (2.8)     | IPEA <sub>1</sub> -N <sup>1</sup> -HOH-Asn562-O <sup><math>\delta</math>1</sup> | 2.9 (2.7)-HOH-2.8 (3.1)              | flavin, Phe94,<br>Pro96, Ile120,<br>Ala133, Val135,<br>Ile403, Tyr476,<br>Asn562, His564,<br>Ser607                      |
| IPEA <sub>1</sub> -pyrrole-Tyr476*                                          | 3.3 (3.4)     | IPEA <sub>1</sub> -N <sup>1</sup> -HOH-Asn562-N <sup>82</sup>                   | 2.9 (2.7)-HOH-3.4 (3.5)              |                                                                                                                          |
|                                                                             |               | IPEA <sub>1</sub> -N <sup>1</sup> -HOH-FAD-N <sup>5</sup>                       | 2.9 (2.7)-HOH-3.1 (2.9)              |                                                                                                                          |
|                                                                             |               | IPEA <sub>1</sub> -N <sup>1</sup> -HOH-His564-N <sup>62</sup>                   | 2.9 (2.7)-HOH-2.7 (3.0)              |                                                                                                                          |
| IPEA <sub>2</sub> -pyrrole-Trp97*,*                                         | 3.3           | IPEA <sub>2</sub> -N <sup>1</sup> -HOH-Leu629-O                                 | 3.0-HOH-2.6                          | Leu98*, Trp97*,<br>Asp621, Lys624,<br>Lys625, Arg628,<br>Leu629                                                          |
|                                                                             |               | IPEA <sub>2</sub> -N <sup>1</sup> -HOH-Glu621-O                                 | 3.1-HOH-2.3                          |                                                                                                                          |
|                                                                             |               | IPEA <sub>2</sub> -N <sup>2</sup> -HOH-Lys625-N                                 | 3.1-HOH-3.5                          |                                                                                                                          |
|                                                                             |               | IPEA <sub>2</sub> -N <sup>2</sup> -HOH-Trp97-O*                                 | 2.9-HOH-2.8                          |                                                                                                                          |
| <i>4NC</i>                                                                  |               |                                                                                 |                                      |                                                                                                                          |
| 4NC <sub>1</sub> -O <sup>8</sup> -Gln351-O <sup>e1</sup>                    | 2.9           | 4NC <sub>1</sub> -O <sup>7</sup> -HOH-Gln351-O                                  | 3.5 (3.6)-HOH-2.9 (3.0)              | Leu137, Lys231,<br>Phe235, Gln351,<br>Ile403, Val405,<br>Thr464, Tyr476,<br>Leu478, Asn562,<br>His564, Gly606,<br>Ser607 |
| 4NC <sub>1</sub> -O <sup>7</sup> -Asn562-N <sup>82</sup>                    | 3.3 (3.4)     | 4NC <sub>1</sub> -O <sup>7</sup> -HOH-Asn562-N <sup>82</sup>                    | 3.5 (3.6)-HOH-2.9 (2.8)              |                                                                                                                          |
| 4NC <sub>1</sub> -O <sup>7</sup> -FMT-O <sup>1</sup>                        | 2.6           |                                                                                 |                                      |                                                                                                                          |
| 4NC <sub>2</sub> -O <sup>11</sup> -Ala563-N                                 | 3.1 (3.5)     | 4NC <sub>2</sub> -O <sup>10</sup> -HOH-Asn559-N <sup>62</sup>                   | 3.1 (2.9)-HOH-3.1-3.8 (3.0)          | flavin, Phe100,<br>Ile120, Ser561,<br>Asn562, Ala563,<br>Asn559                                                          |
| 4NC <sub>2</sub> -O <sup>10</sup> -Asn559-N <sup>62</sup>                   | 3.0-3.4 (3.3) | 4NC <sub>2</sub> -O <sup>10</sup> -HOH-Asp118-O                                 | 3.1 (2.9)-HOH-2.7                    |                                                                                                                          |

## 4NP

|                                             |           |                                                 |                                    |                                                                                                               |
|---------------------------------------------|-----------|-------------------------------------------------|------------------------------------|---------------------------------------------------------------------------------------------------------------|
| 4NP <sub>1</sub> -OH-FMT-O <sup>1</sup>     | 2.6       | 4NP <sub>1</sub> -OH-HOH-Gln351-O               | 3.6 (3.5)-HOH-3.0                  | Leu137, Lys231,<br>Phe235, Ile403,<br>Val405, Thr464,<br>Tyr476, Leu478,<br>Asn562, His564,<br>Gly606, Ser607 |
| 4NP <sub>1</sub> -OH-Asn562-N <sup>δ2</sup> | 3.3 (3.4) | 4NP <sub>1</sub> -OH-HOH-Asn562-N <sup>δ2</sup> | 3.6 (3.5)-HOH-2.8-3.5<br>(2.7-3.6) |                                                                                                               |
| 4NP <sub>2</sub> -OH-Ser561-O               | 3.1       | 4NP <sub>2</sub> -OH-HOH-Asn559-O <sup>δ1</sup> | 2.9                                | flavin, Phe94,<br>Pro96, Ile120,<br>Ser561-Ala563<br>peptide                                                  |
|                                             |           | 4NP <sub>2</sub> -OH-HOH-Ser561-O               | 2.9                                |                                                                                                               |

## ABTS

|                                                |           |                                                    |                         |                                                                                                            |
|------------------------------------------------|-----------|----------------------------------------------------|-------------------------|------------------------------------------------------------------------------------------------------------|
| ABTS-O <sup>47</sup> -FAD-N <sup>1</sup>       | 3.5 (3.6) | ABTS-O <sup>46</sup> -HOH-Gln351-O <sup>ε1</sup>   | 2.9-HOH-3.2 (3.3)       |                                                                                                            |
| ABTS-O <sup>47</sup> -FAD-N <sup>3</sup>       | 3.1       | ABTS-S <sup>18</sup> -HOH-Asn397-O <sup>δ1</sup>   | 3.3 (3.6)-HOH-3.5 (3.4) |                                                                                                            |
| ABTS-O <sup>47</sup> -FAD-N <sup>5</sup>       | 3.4       | ABTS-S <sup>18</sup> -HOH-Asn397-O                 | 3.3 (3.6)-HOH-2.9 (3.0) | flavin, Phe94,<br>Pro96, Trp97,<br>Ala133, Val135,<br>Ser398, Leu399,<br>Tyr476, Asn562,<br>His564, Ser607 |
| ABTS-O <sup>47</sup> -His564-N <sup>ε2</sup>   | 2.6 (2.7) | ABTS-S <sup>18</sup> -HOH-Ser398-O <sup>γ</sup>    | 3.3 (3.6)-HOH-3.4 (3.7) |                                                                                                            |
| ABTS-O <sup>45</sup> -Ser607-O <sup>γ</sup>    | 3.3 (3.4) | ABTS-S <sup>9</sup> -HOH-Asn562-O <sup>δ1</sup>    | 3.5 (3.6)-HOH-3.0 (3.2) |                                                                                                            |
| ABTS-O <sup>46</sup> -Asn562-N <sup>δ2</sup>   | 3.0       | ABTS-S <sup>9</sup> -HOH-Asn562-O                  | 3.5 (3.6)-HOH-3.2 (3.3) |                                                                                                            |
| ABTS-O <sup>39</sup> -Arg628-N <sup>η2</sup> * | 3.4 (-)   | ABTS-O <sup>45</sup> -HOH-Ser607-O <sup>γ</sup>    | 3.0-HOH-3.0 (2.8)       |                                                                                                            |
|                                                |           | ABTS-O <sup>45</sup> -HOH-Ser607-N                 | 3.0-HOH-3.6 (3.4)       |                                                                                                            |
|                                                |           | ABTS-O <sup>48</sup> -HOH-Asp621-O <sup>δ2</sup> * | 3.3 (-)-HOH-3.1 (-)     |                                                                                                            |

## References

- Hajizadeh, N. R., Franke, D., Jeffries, C. M. & Svergun, D. I. (2018). *Sci. Rep.* **8**, 7204.
- Ho, B. K. & Gruswitz, F. (2008). *BMC Struct. Biol.* **8**, 49.
- Terwilliger, T. C., Grosse-Kunstleve, R. W., Afonine, P. V., Moriarty, N. W., Adams, P. D., Read, R. J., Zwart, P. H. & Hung, L. W. (2008). *Acta Crystallogr. Sect. D Biol. Crystallogr.* **64**, 515–524.
